# Supplementary material for: Oligomeric ricinoleic acid preparation promoted by an efficient and recoverable Brønsted acidic ionic liquid
Source: publisher site journal article supplement (doi:10.3762/bjoc.16.34), 2020-03-10
Supplement: Additional file 1 [file 1860-5397-16-34-S1.pdf]

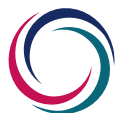

## Supporting Information

for

### **Oligomeric ricinoleic acid preparation promoted by an efficient and recoverable Brønsted acidic ionic liquid**

Fei You, Xing He, Song Gao, Hong-Ru Li and Liang-Nian He

*Beilstein J. Org. Chem.* **2020**, *16*, 351–361. doi:10.3762/bjoc.16.34

### **Experimental part and spectra of synthesized compounds**

**Contents:**

S3: General information

S3: General procedures for the preparation of ILs

S7: Characterization of ILs

S31: Products characterization

S35: References

## General information

All chemicals in experiments were obtained commercially and used as received directly. The FT-IR spectra of the samples were recorded using Bruker Tensor 27 FT-IR in the range of 4000-400  $\text{cm}^{-1}$  with KBr pellets.  $^1\text{H}$  NMR spectra was recorded on Bruker AVANCE III HD 400 spectrometer (Bruker BioSpin, Rheinstetten, Germany) using  $\text{CDCl}_3$ ,  $\text{D}_2\text{O}$  or  $\text{DMSO-}d_6$  as solvent referenced to  $\text{CDCl}_3$  (7.26 ppm),  $\text{D}_2\text{O}$  (4.79 ppm) or  $\text{DMSO-}d_6$  (2.50 ppm).  $^{13}\text{C}$  NMR spectra was recorded at 100 MHz in  $\text{CDCl}_3$  (77.16 ppm),  $\text{D}_2\text{O}$  or  $\text{DMSO-}d_6$  (39.52 ppm). Acid value analysis was performed on DZY-ZJ5 microcomputer acid value tester (Instruments And Meters Co., Ltd, Dalian, China). Viscosity analysis was performed on kinematic viscosity tester (Instruments And Meters Co., Ltd, Dalian, China) adopting ASTM D 445 standards. Melting points were determined on an XT4A melting point apparatus without calibration. Electrospray ionization mass spectra (ESI-MS) were recorded with an Agilent 6520 Q-TOF mass spectrometer.

## General procedures for the preparation of ILs

**[NMP] $\text{H}_2\text{PO}_4$ :** To prepare the IL [NMP] $\text{H}_2\text{PO}_4$ , a dropwise addition of 1 equiv. of phosphoric acid to cooled N-methyl-2-pyrrolidinone was performed. After the addition, the reaction mixture was stirred for 24 h at 80 °C. Then the water was removed by heating the residue at 80 °C in high vacuum until the weight of the residue remained constant [1].

**[NMP] $\text{HSO}_4$ :** To prepare the IL [NMP] $\text{HSO}_4$ , 1 equiv. of sulfuric acid was added to cooled N-methyl-2-pyrrolidinone dropwise. Afterward, the resulting mixture was stirred for 24 h at 80 °C. Then the water was removed by heating the residue at 80 °C in high vacuum until the weight of the residue remained constant [1].

**[NMP]PTSA:** To prepare the IL [NMP]H<sub>2</sub>PO<sub>4</sub>, a dropwise addition of 1 equiv. of *p*-toluenesulfonic acid to cooled N-methyl-2-pyrrolidinone was performed. After the addition, the reaction mixture was stirred for 24 h at 80 °C. Then the water was removed by heating the residue at 80 °C in high vacuum until the weight of the residue remained constant [1].

**[NMP]CF<sub>3</sub>SO<sub>3</sub>:** To prepare the IL [NMP]H<sub>2</sub>PO<sub>4</sub>, 1 equiv. of trifluoromethanesulfonic acid was added to cooled N-methyl-2-pyrrolidinone dropwise. After the addition, the reaction mixture was stirred for 24 h at 80 °C. Then the water was removed by heating the residue at 80 °C in high vacuum until the weight of the residue remained constant.

**[HSO<sub>3</sub>-BDBU]H<sub>2</sub>PO<sub>4</sub>:** To prepare the IL [HSO<sub>3</sub>-BDBU]H<sub>2</sub>PO<sub>4</sub>, HSO<sub>3</sub>-BDBU was prepared first. In the preparation of HSO<sub>3</sub>-BDBU, 0.1 mol (13.6 g) 1,4-butane sultone was mixed with 0.1 mol (15.2 g) 1,8-diazobicyclo[5,4,0]undec-7-ene (DBU) in a flask containing 50 mL of acetonitrile. After 24 h of reflux at 80 °C, the reaction mixture was cooled to room temperature. Then 30 mL diethyl ether was added to the reaction mixture to precipitate the product HSO<sub>3</sub>-BDBU. After that, the precipitate was collected by filtration and washed twice with diethyl ether. The resulting light yellow precipitate was then dried in vacuum at 60 °C for 4 h. Afterward, the CH<sub>2</sub>Cl<sub>2</sub> solution of HSO<sub>3</sub>-BDBU was prepared by dissolving 0.05 mol (14.4 g) HSO<sub>3</sub>-BDBU in 50 mL CH<sub>2</sub>Cl<sub>2</sub>. Then, the aqueous solution containing a stoichiometric amount of phosphoric acid was added dropwise to the CH<sub>2</sub>Cl<sub>2</sub> solution containing HSO<sub>3</sub>-BDBU and stirred at 60 °C for 4 h, forming viscous liquid on the surface of CH<sub>2</sub>Cl<sub>2</sub> which can be easily separated by centrifugation. Then the viscous liquid was washed twice with CH<sub>2</sub>Cl<sub>2</sub> and dried at 100 °C for 12 h, obtaining 18.6 g yellow viscous liquid with the yield of 96%. The resulting compound was identified to be IL [HSO<sub>3</sub>-BDBU]H<sub>2</sub>PO<sub>4</sub>.

**[HSO<sub>3</sub>-BPy]H<sub>2</sub>PO<sub>4</sub>:** To prepare the IL [HSO<sub>3</sub>-BPy]H<sub>2</sub>PO<sub>4</sub>, HSO<sub>3</sub>-BPy was prepared first. To prepare HSO<sub>3</sub>-BPy, 0.1 mol (13.6 g) 1,4-butane sultone was mixed with 0.1 mol (7.9 g) pyridine in a flask containing 50 mL of acetonitrile. After 24 h of reflux at 80 °C, the reaction mixture was cooled to room temperature and a precipitate was observed. The precipitate was collected by filtration and washed twice with diethyl ether. The resulting white precipitate was then dried in vacuum at 60 °C for 4 h and HSO<sub>3</sub>-BPy was obtained. Afterward, the aqueous solution containing a stoichiometric amount of phosphoric acid was added dropwise to 50 mL CH<sub>2</sub>Cl<sub>2</sub> containing 0.05 mol (10.8 g) HSO<sub>3</sub>-BPy and stirred at 60 °C for 4 h. The upper viscous liquid is then separated and washed twice with ether. Drying at 100 °C for 12 h yielded a colorless viscous liquid (14.8 g) of 94%. The resulting compound was identified to be IL [HSO<sub>3</sub>-BPy]H<sub>2</sub>PO<sub>4</sub>.

**[HSO<sub>3</sub>-BMim]H<sub>2</sub>PO<sub>4</sub>:** To prepare the IL [HSO<sub>3</sub>-BMim]H<sub>2</sub>PO<sub>4</sub>, HSO<sub>3</sub>-BMim was prepared first. In the preparation of HSO<sub>3</sub>-BMim, 0.1 mol (13.6 g) 1,4-butane sultone was mixed with 0.1 mol (8.2 g) methylimidazole in a flask containing 50 mL of acetonitrile. After 24 h of reflux at 80 °C, the reaction mixture was cooled to room temperature and a precipitate was observed. The precipitate was collected by filtration and washed twice with diethyl ether. The resulting white precipitate was then dried in vacuum at 60 °C for 4 h and HSO<sub>3</sub>-BMim was obtained. Afterward, the aqueous solution containing a stoichiometric amount of phosphoric acid was added dropwise to 50 mL CH<sub>2</sub>Cl<sub>2</sub> containing 0.05 mol (10.9 g) HSO<sub>3</sub>-BMim and stirred at 60 °C for 4 h. The upper viscous liquid is then separated and washed twice with ether. Drying at 100 °C for 12 h yielded a colorless viscous liquid (15.2 g) of 96%. The resulting compound was identified to be IL [HSO<sub>3</sub>-BMim]H<sub>2</sub>PO<sub>4</sub> [2].

**[HSO<sub>3</sub>-BNet<sub>3</sub>]H<sub>2</sub>PO<sub>4</sub>:** To prepare the IL [HSO<sub>3</sub>-BNet<sub>3</sub>]H<sub>2</sub>PO<sub>4</sub>, HSO<sub>3</sub>-BNet<sub>3</sub> was prepared first. To get HSO<sub>3</sub>-BNet<sub>3</sub>, 0.1 mol (13.6 g) 1,4-butane sultone was mixed with 0.1 mol (10.1

g) triethylamine in a flask containing 50 mL of acetonitrile. After 24 h reflux at 80 °C, the reaction mixture was cooled to room temperature and a precipitate was observed. The precipitate was collected by filtration and washed twice with diethyl ether. The resulting white precipitate was then dried in vacuum at 60 °C for 4 h, affording HSO<sub>3</sub>-BNEt<sub>3</sub>. Afterward, the aqueous solution containing a stoichiometric amount of phosphoric acid was added dropwise to 50 mL CH<sub>2</sub>Cl<sub>2</sub> containing 0.05 mol (11.9 g) HSO<sub>3</sub>-BNEt<sub>3</sub> and stirred at 60 °C for 4 h. The upper viscous liquid is then separated and washed twice with ether. Drying at 100 °C for 12 h yielded a colorless viscous liquid (16.0 g) of 95% . The resulting compound was identified to be IL [HSO<sub>3</sub>-BNEt<sub>3</sub>]H<sub>2</sub>PO<sub>4</sub>.

## Characterization of ILs

### [NMP]H<sub>2</sub>PO<sub>4</sub>:

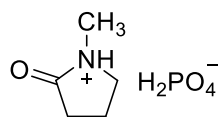

Colorless viscous liquid; <sup>1</sup>H NMR (400 MHz, CDCl<sub>3</sub>) δ: 1.98-2.06 (m, 2H), 2.36-2.40 (t, *J* = 8.1 Hz, 2H), 2.84 (s, 3H), 2.36-3.40 (t, *J* = 7.1 Hz, 2H) ppm; <sup>13</sup>C NMR (100 MHz, CDCl<sub>3</sub>) δ: 17.62, 29.53, 30.66, 49.39, 175.02 ppm; FT-IR (KBr) *V*<sub>max</sub>/ cm<sup>-1</sup>: 2937.04, 2892.25, 2306.23, 1629.84, 1117.27, 1004.48, 882.52, 484.05; ESI-MS: *m/z* (+) 100.1, 198.9.

### <sup>1</sup>H NMR spectrum of [NMP]H<sub>2</sub>PO<sub>4</sub>:

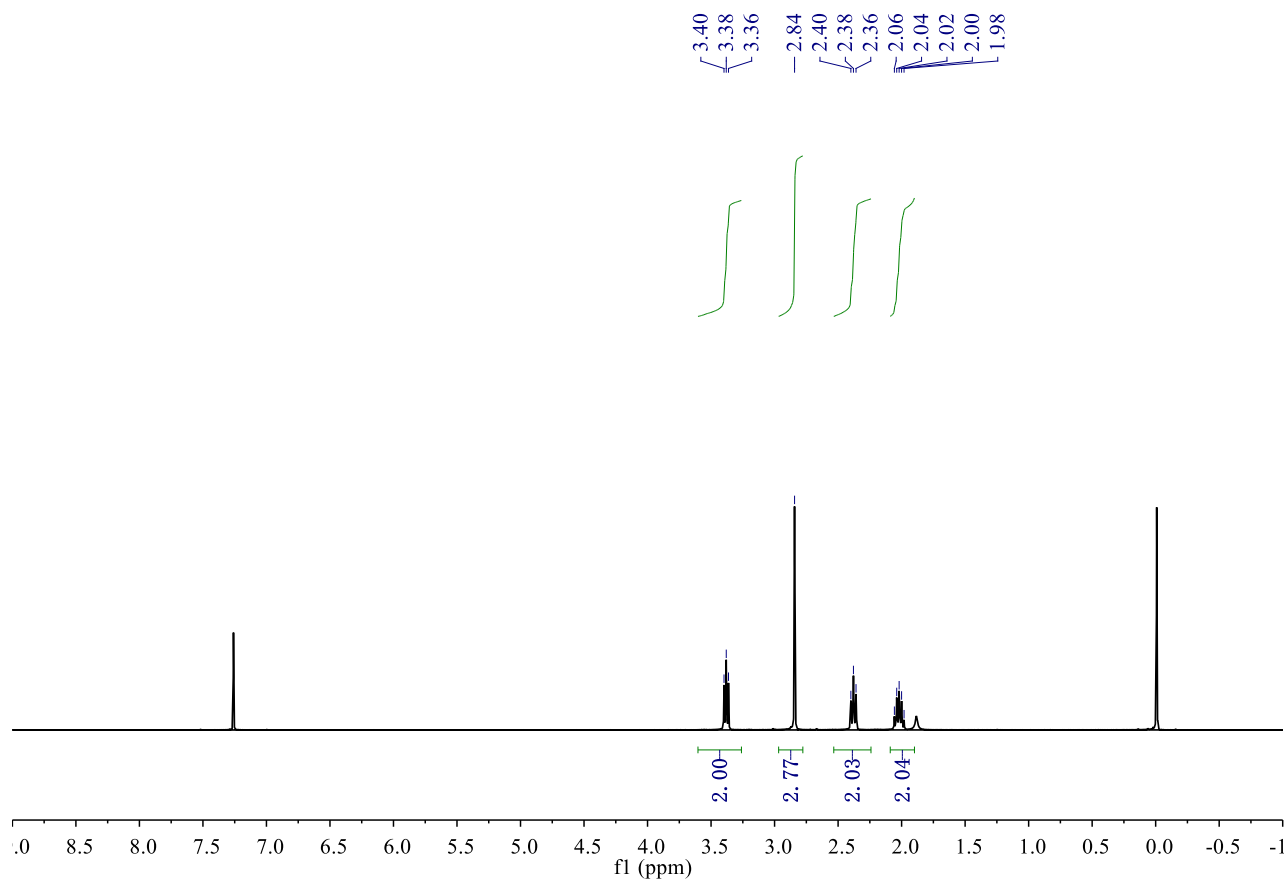

**$^{13}\text{C}$  NMR spectrum of  $[\text{NMP}]\text{H}_2\text{PO}_4$ :**

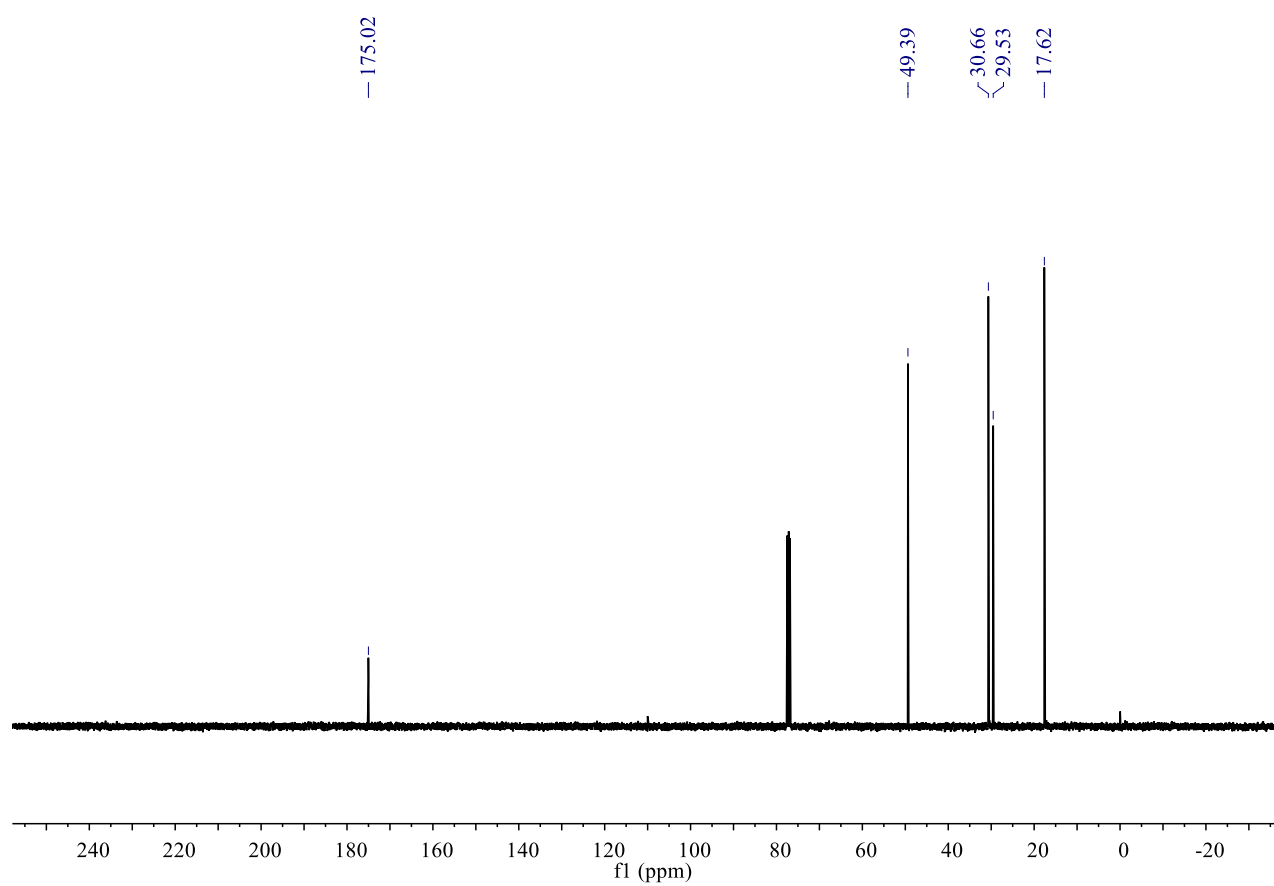



### FT-IR spectrum of [NMP]H<sub>2</sub>PO<sub>4</sub>:

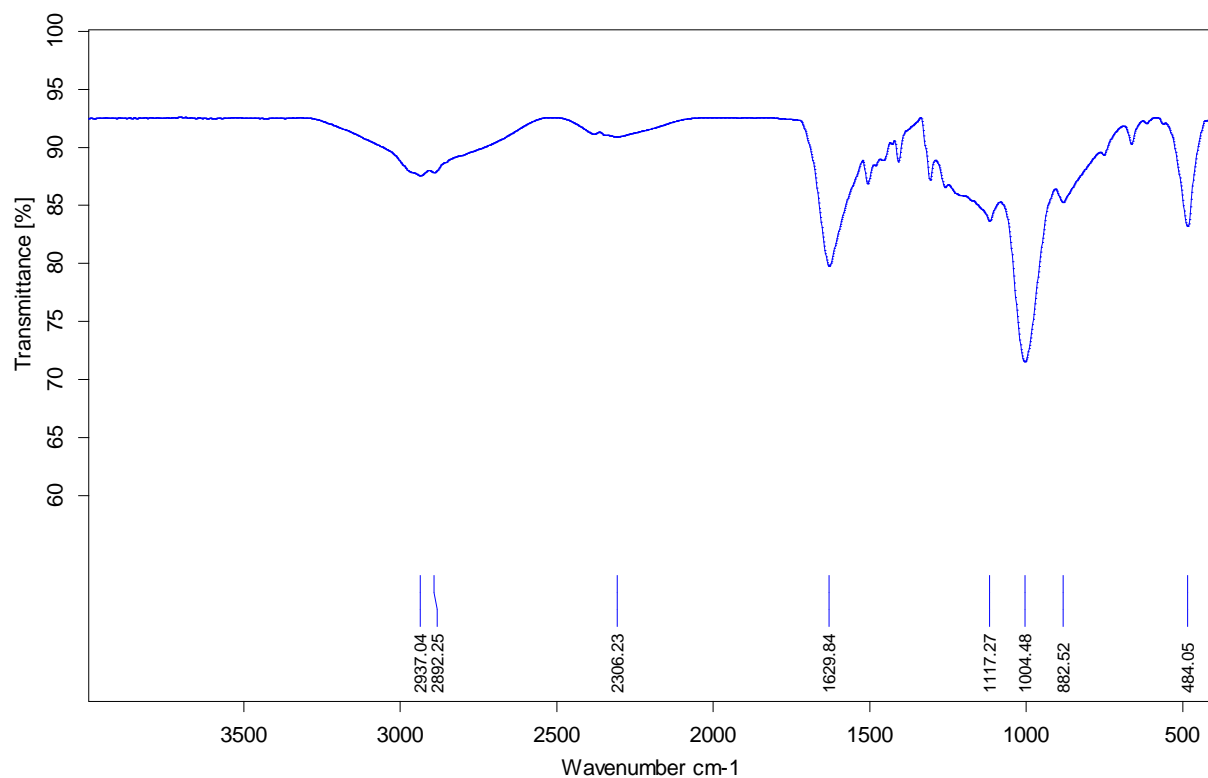

### ESI-MS spectrum of [NMP]H<sub>2</sub>PO<sub>4</sub>:

y:il-1 #27 RT: 0.44 AV: 1 NL: 5.21E4  
T: + p ESI Full ms [50.00-500.00]

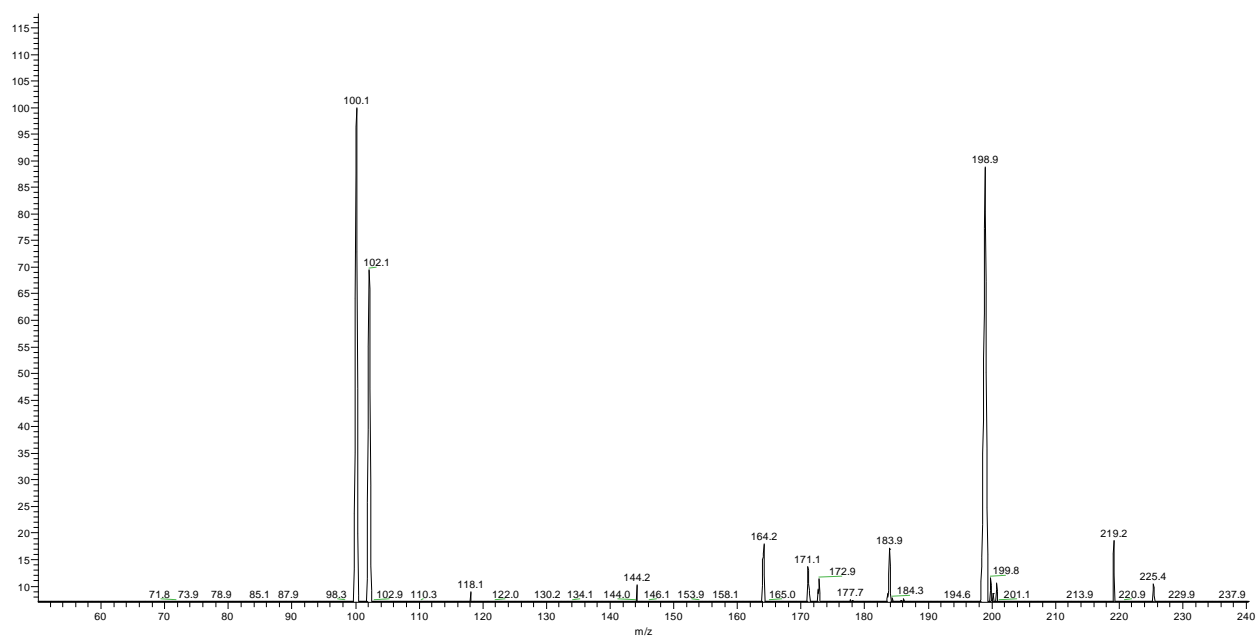

**[NMP]HSO<sub>4</sub>:**

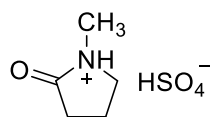

Colorless viscous liquid; <sup>1</sup>H NMR (400 MHz, CDCl<sub>3</sub>)  $\delta$ : 1.99-2.06 (m, 2H), 2.40-2.44 (t, *J* = 8.1 Hz, 2H), 2.85 (s, 3H), 3.37-3.41 (t, *J* = 7.1 Hz, 2H) ppm; <sup>13</sup>C NMR (100 MHz, CDCl<sub>3</sub>)  $\delta$ : 17.70, 29.83, 30.69, 49.76, 178.23 ppm; FT-IR (KBr) *V*<sub>max</sub>/ cm<sup>-1</sup>: 3385.84, 3187.78, 2950.81, 1659.05, 1485.88, 1219.03, 1192.67, 1079.02, 1049.26, 885.08, 764.82, 590.62; ESI-MS: *m/z* (+) 100.1, 199.0.

**<sup>1</sup>H NMR spectrum of [NMP]HSO<sub>4</sub>:**

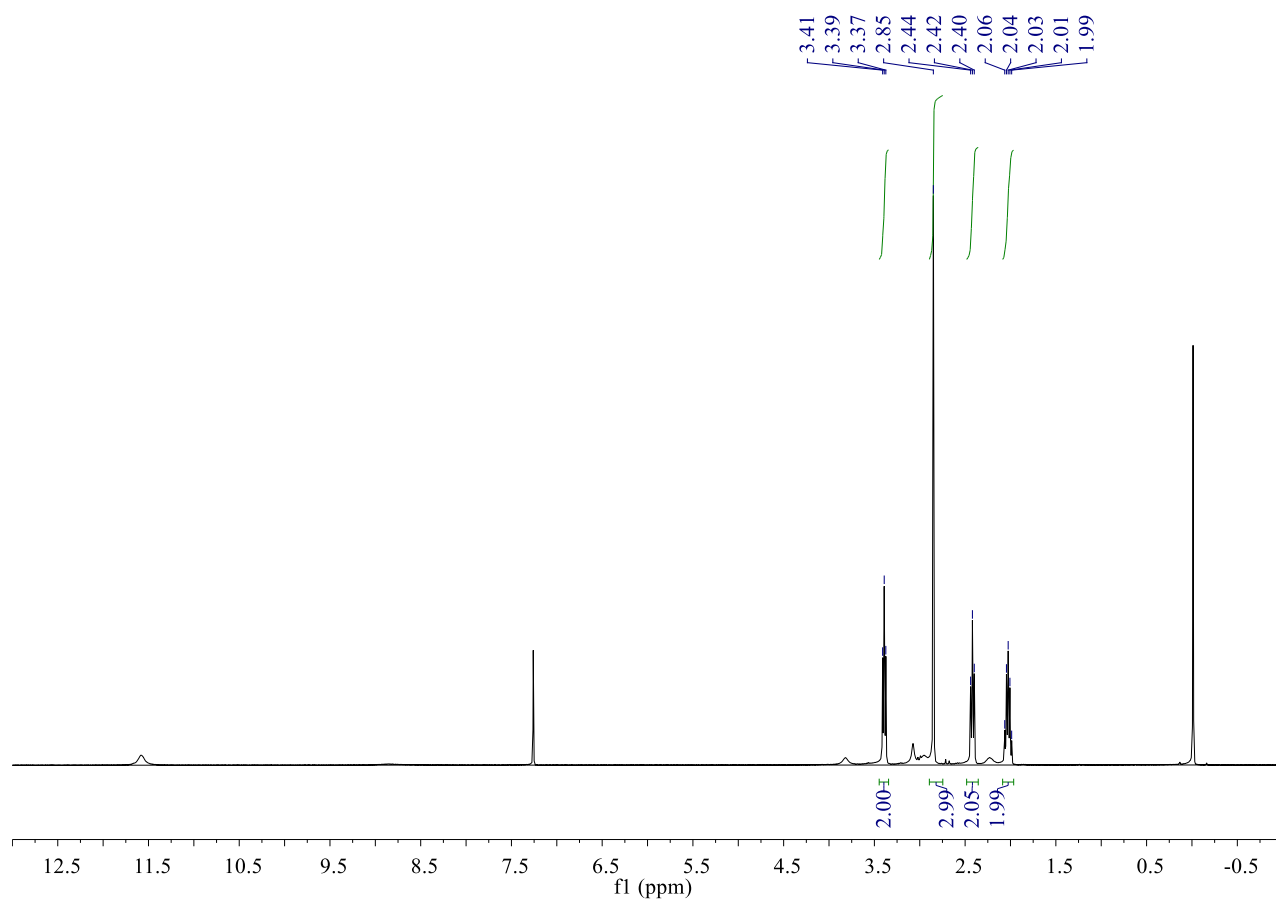

**$^{13}\text{C}$  NMR spectrum of [NMP]HSO<sub>4</sub>:**

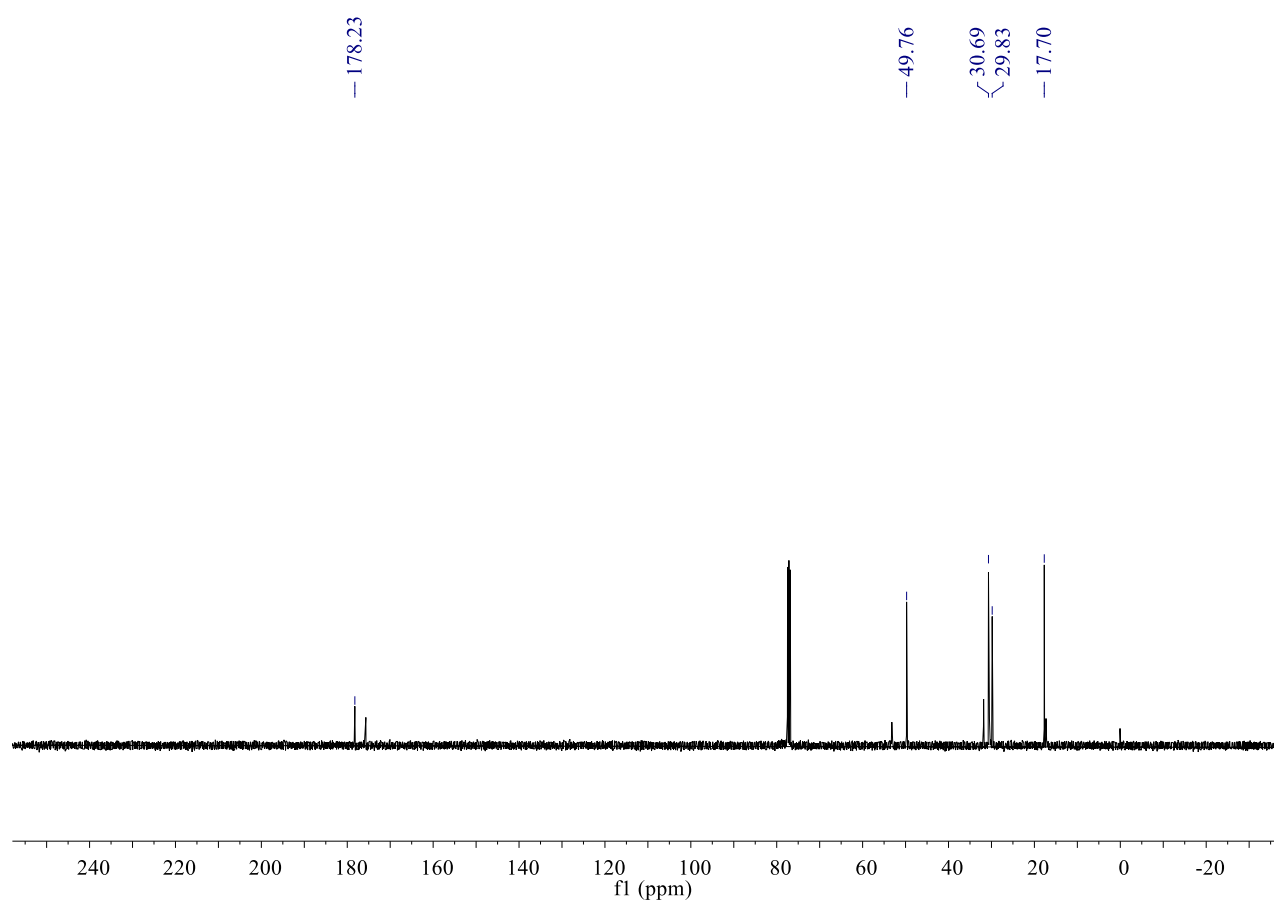

### FT-IR spectrum of [NMP]HSO<sub>4</sub>:

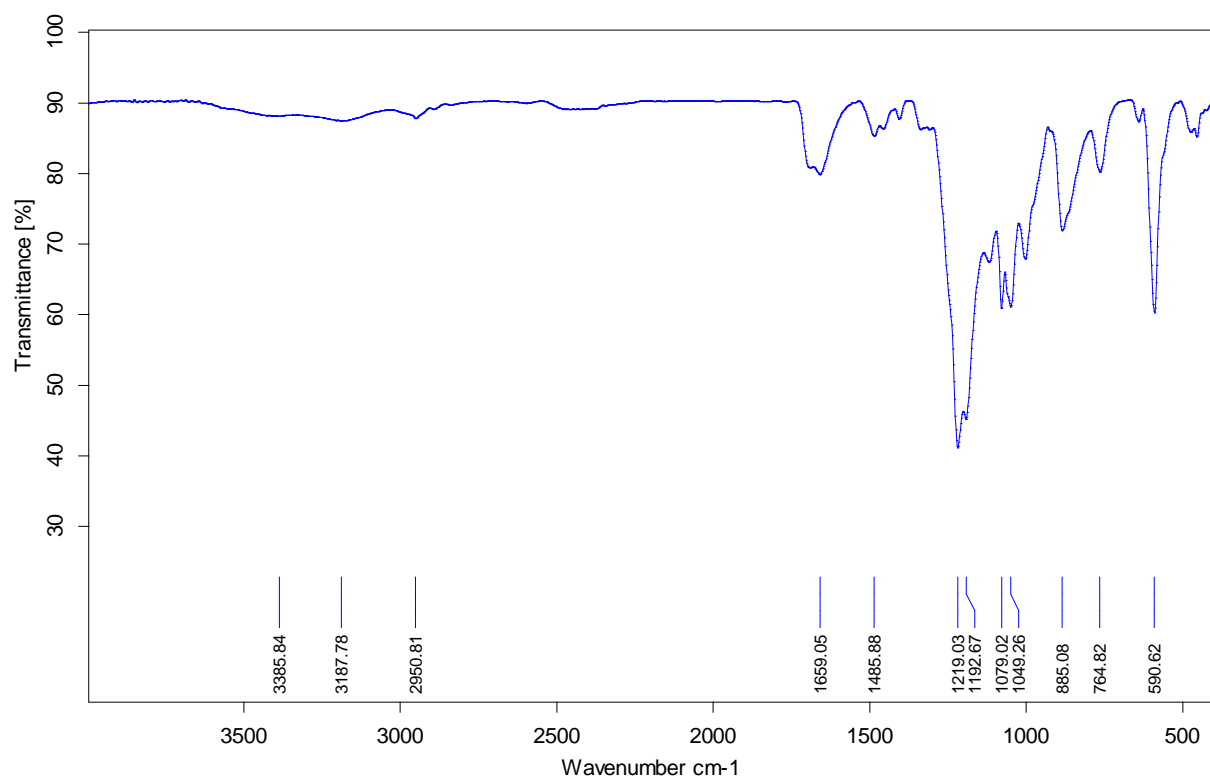

### ESI-MS spectrum of [NMP]HSO<sub>4</sub>:

y-l-2 #37 RT: 0.43 AV: 1 NL: 1.47E5  
T: + p ESI Full ms [50.00-400.00]

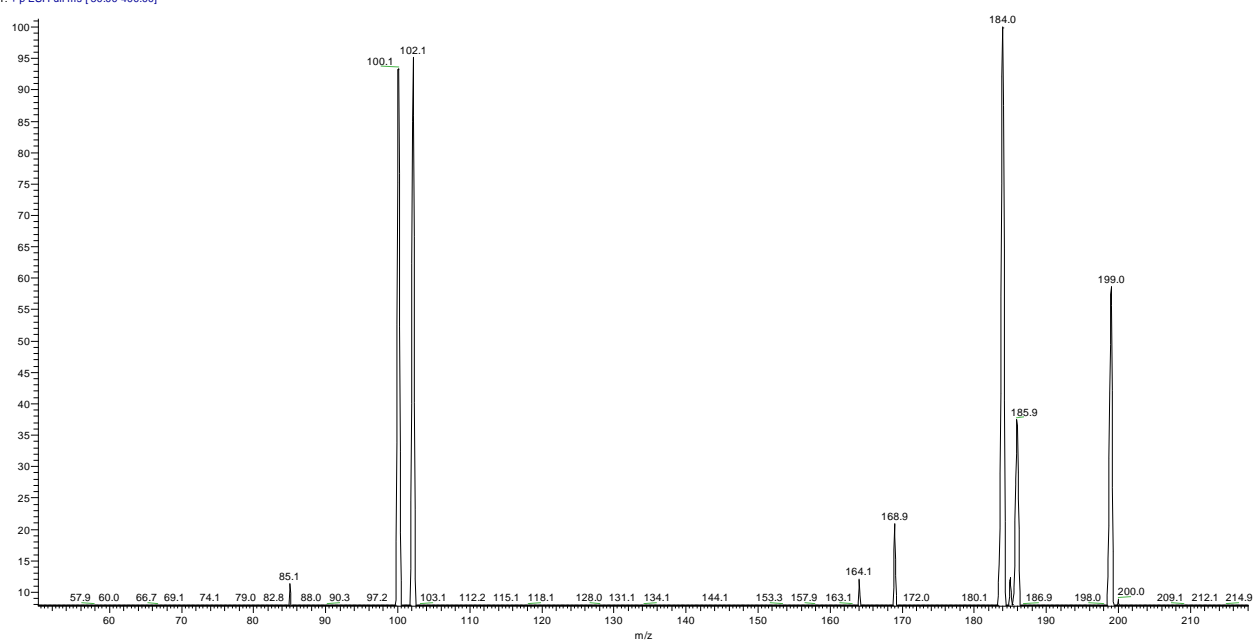

### [NMP]PTSA:

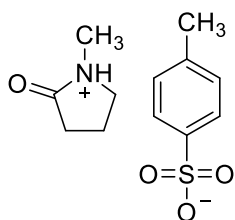

White solid; m. p.: 81-85 °C;  $^1\text{H}$  NMR (400 MHz,  $\text{CDCl}_3$ )  $\delta$ : 2.10-2.17 (m, 2H), 2.36 (s, 3H), 2.86-2.90 (t,  $J = 8.1$  Hz, 2H), 2.97 (s, 3H), 3.56-3.60 (t,  $J = 7.3$  Hz, 2H), 7.19-7.26 (m, 2H), 7.74-7.76 (d,  $J = 8.2$  Hz, 2H) ppm;  $^{13}\text{C}$  NMR (100 MHz,  $\text{CDCl}_3$ )  $\delta$ : 17.59, 21.53, 30.39, 31.19, 51.71, 126.30, 129.20, 139.67, 141.68, 178.48 ppm; FT-IR (KBr)  $\nu_{\text{max}}$ /  $\text{cm}^{-1}$ : 3419.96, 2950.36, 2839.67, 1650.69, 1453.04, 1189.09, 1124.96, 1033.54, 1012.40, 817.51, 686.28, 568.77; ESI-MS:  $m/z$  (-) 171.1, 268.8.

### $^1\text{H}$ NMR spectrum of [NMP]PTSA:

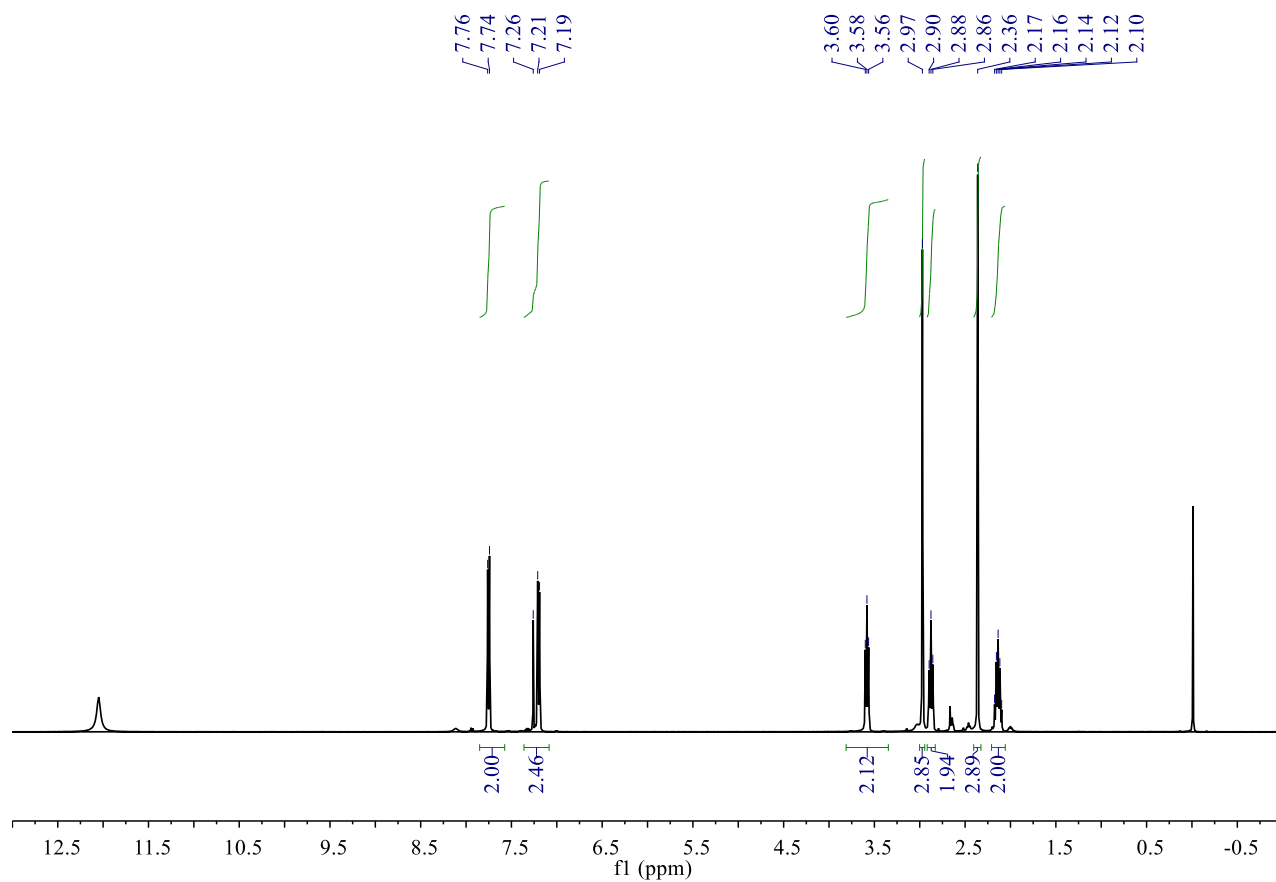

**$^{13}\text{C}$  NMR spectrum of [NMP]PTSA:**

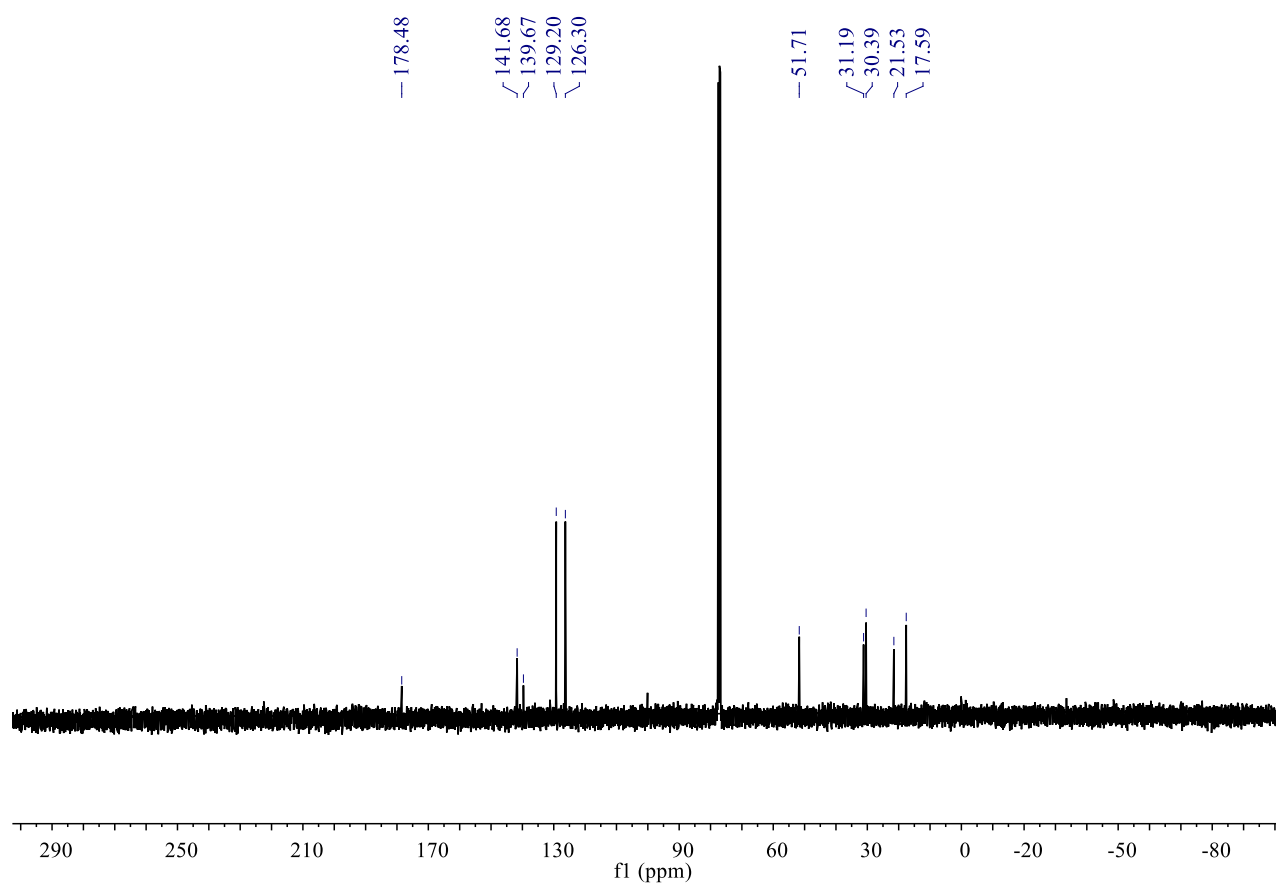

### FT-IR spectrum of [NMP]PTSA:

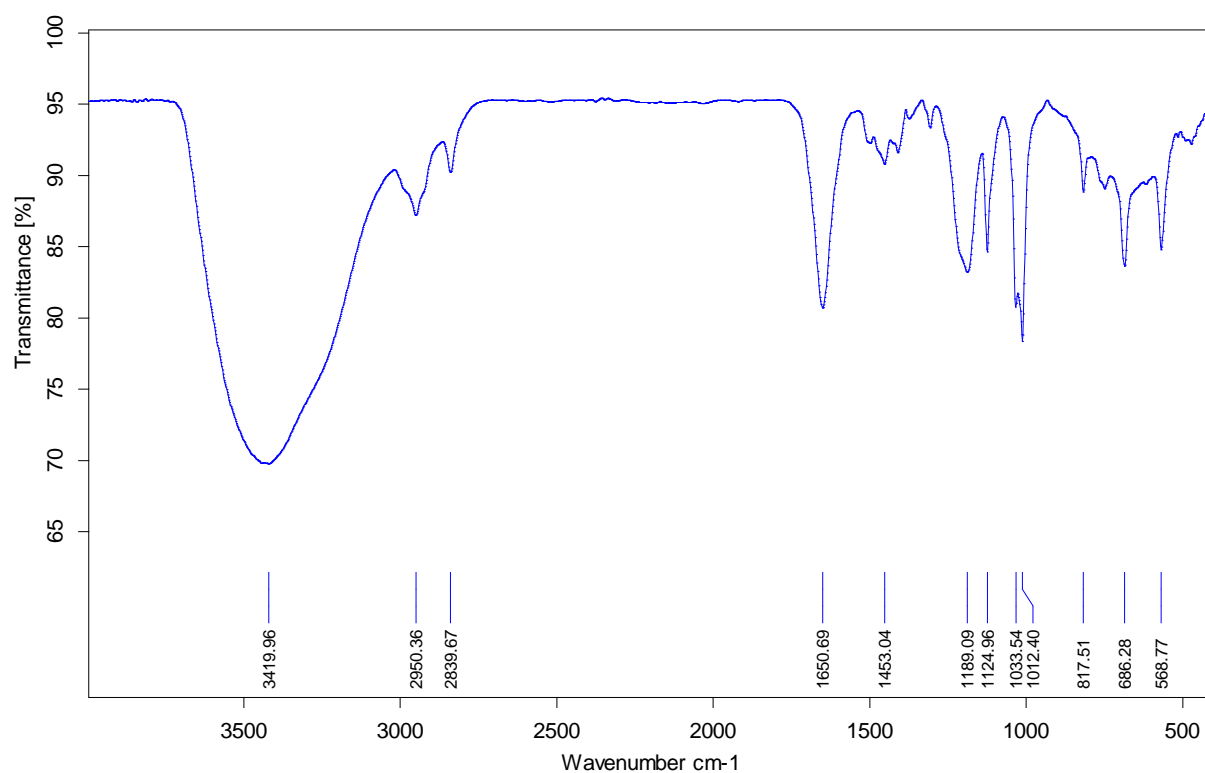

### ESI-MS spectrum of [NMP]PTSA:

Y411-5 #15 RT: 0.17 AV: 1 NL: 6.25E5  
T: -p ESI ms [50.00-500.00]

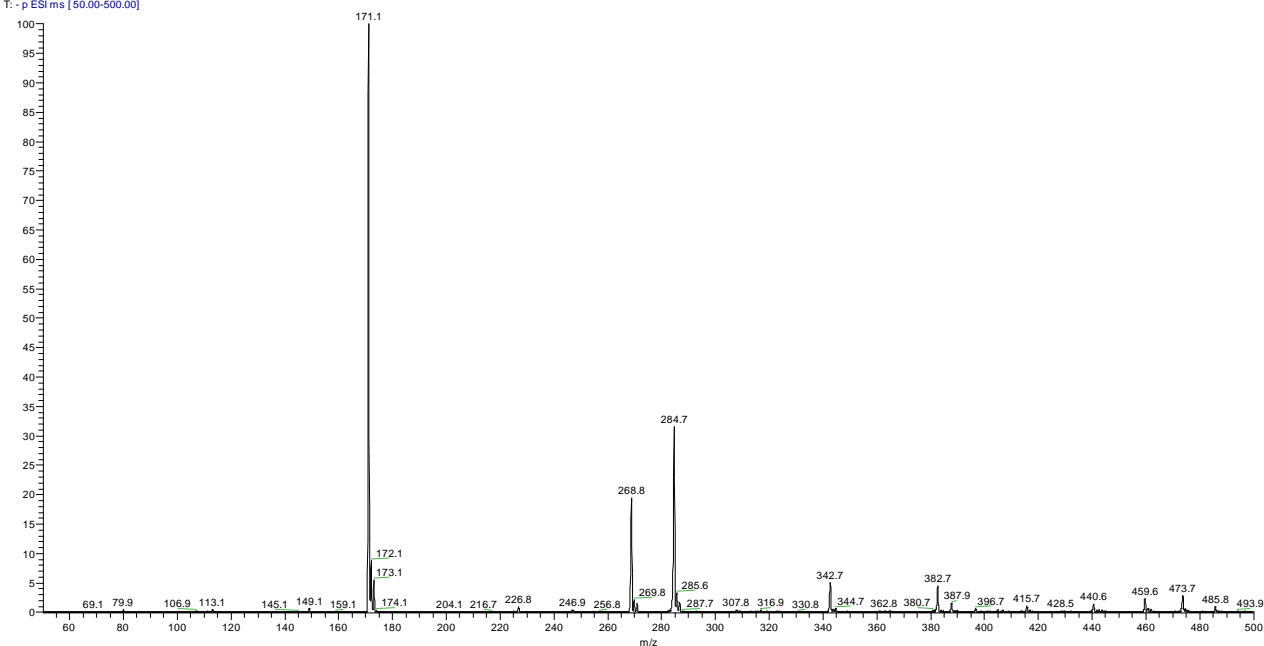

**[NMP]CF<sub>3</sub>SO<sub>3</sub>:**

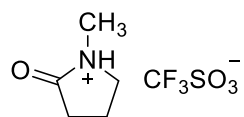

Yellow solid; m. P.: 106-111 °C; <sup>1</sup>H NMR (400 MHz, CDCl<sub>3</sub>) δ: 2.22-2.30 (m, 2H), 2.98-3.02 (t, *J* = 8.1 Hz, 2H), 3.10 (s, 3H), 3.77-3.80 (t, *J* = 7.6 Hz, 2H) ppm; <sup>13</sup>C NMR (100 MHz, CDCl<sub>3</sub>) δ: 17.10, 30.22, 31.72, 53.10, 115.24-124.74, 178.31 ppm; FT-IR (KBr) *V*<sub>max</sub>/ cm<sup>-1</sup>: 3424.48, 2953.94, 2924.80, 2849.82, 1697.70, 1495.17, 1460.72, 1253.22, 1169.22, 1031.03, 974.59, 749.83, 639.16, 576.27, 518.11; ESI-MS: *m/z* (+) 100.1, 183.9, 199.0.

**<sup>1</sup>H NMR spectrum of [NMP]CF<sub>3</sub>SO<sub>3</sub>:**

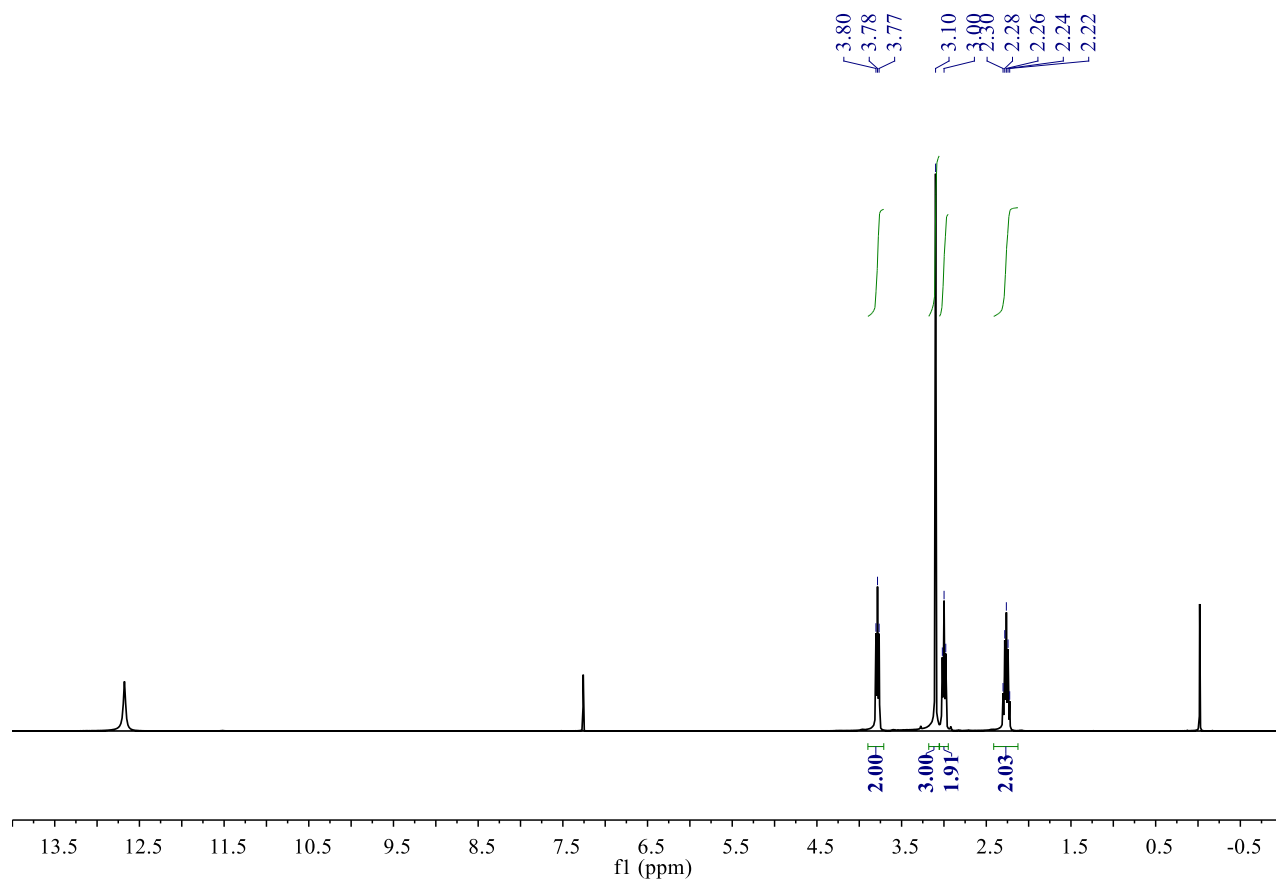



**$^{13}\text{C}$  NMR spectrum of  $[\text{NMP}]\text{CF}_3\text{SO}_3$ :**

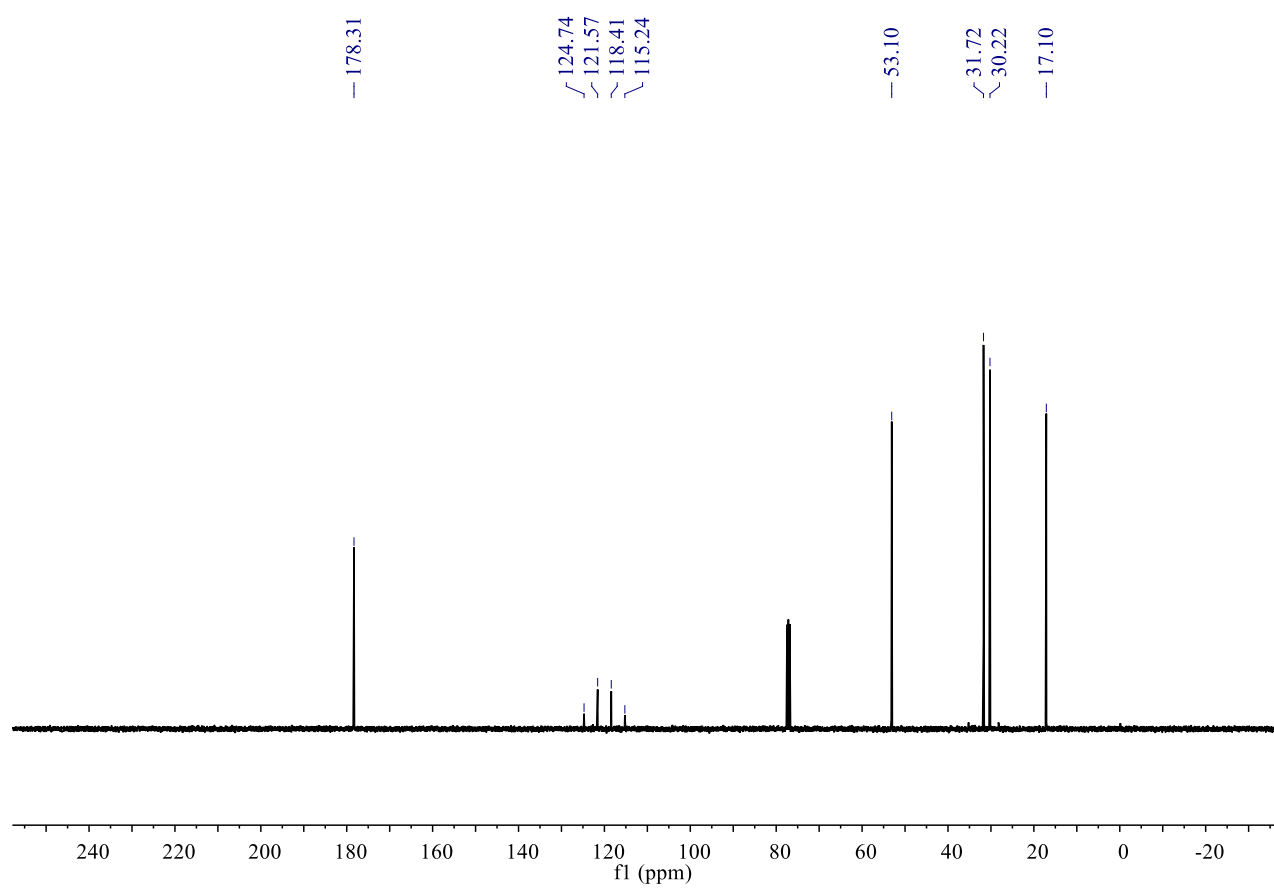

### FT-IR spectrum of [NMP]CF<sub>3</sub>SO<sub>3</sub>:

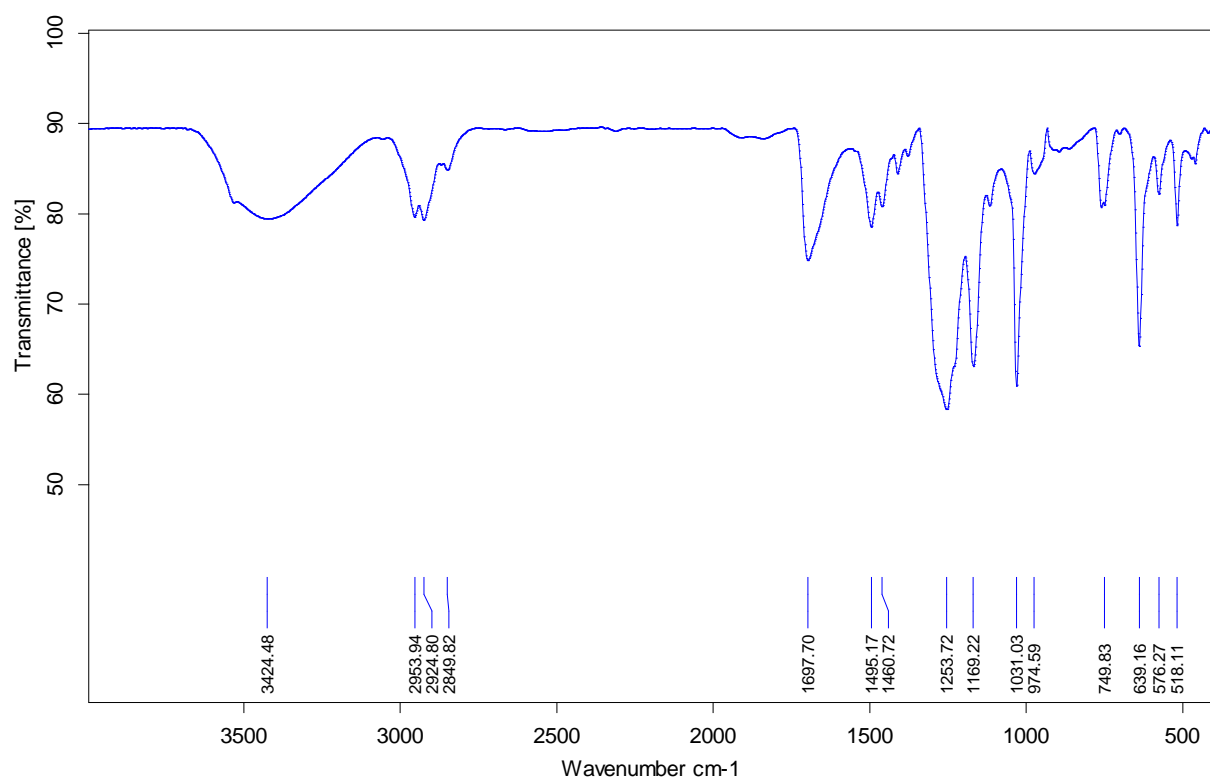

### ESI-MS spectrum of [NMP]CF<sub>3</sub>SO<sub>3</sub>:

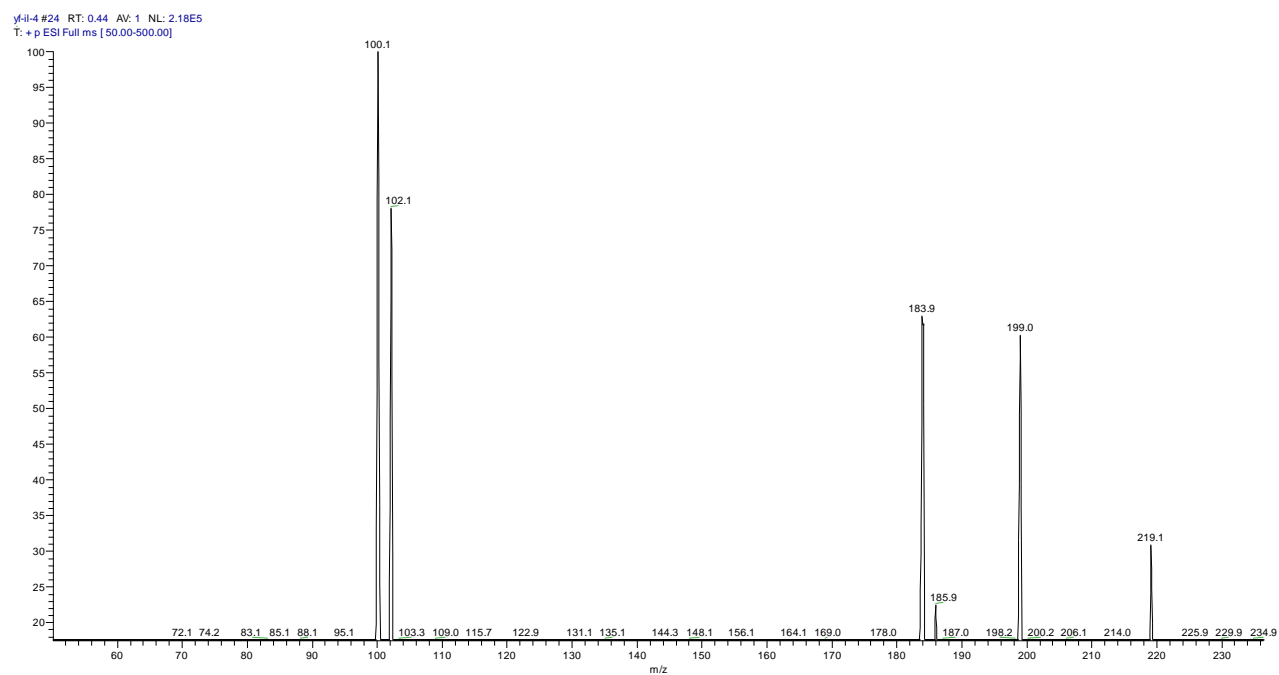

**[HSO<sub>3</sub>-BDBU]H<sub>2</sub>PO<sub>4</sub>:**

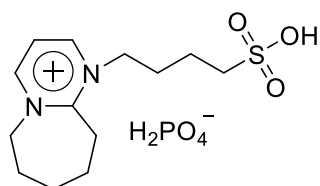

Yellow viscous liquid; <sup>1</sup>H NMR (400 MHz, DMSO-*d*<sub>6</sub>) δ: 1.62-1.67 (m, 10H), 1.92-1.98 (m, 2H), 2.41-2.45 (t, *J* = 6.8 Hz, 2H), 2.85-2.88 (t, *J* = 4.8, 2H), 3.42-3.62 (m, 8H) ppm; <sup>13</sup>C NMR (100 MHz, DMSO-*d*<sub>6</sub>) δ: 19.65, 22.13, 22.88, 25.55, 27.12, 27.22, 27.90, 46.58, 48.52, 50.65, 52.92, 53.98, 165.98 ppm; FT-IR (KBr) *V*<sub>max</sub>/ cm<sup>-1</sup>: 3317.18, 2939.11, 2867.62, 1621.52, 1527.51, 1452.10, 1328.75, 1201.00, 998.74, 726.90, 600.28; ESI-MS: *m/z* (+) 100.1, 102.1, 153.2, 289.3, 390.1.

**<sup>1</sup>H NMR spectrum of [HSO<sub>3</sub>-BDBU]H<sub>2</sub>PO<sub>4</sub>:**

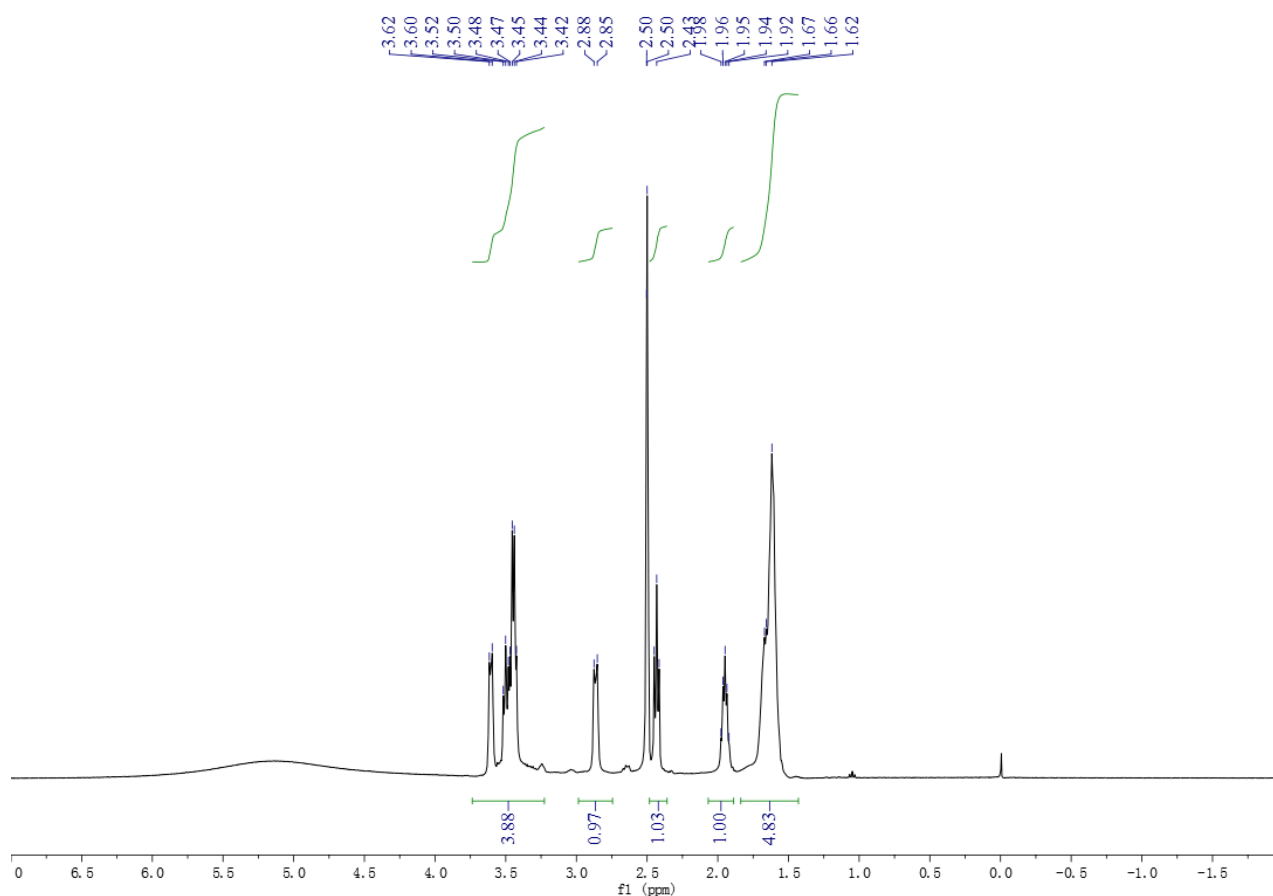

**$^{13}\text{C}$  NMR spectrum of  $[\text{HSO}_3\text{-BDBU}]\text{H}_2\text{PO}_4$ :**

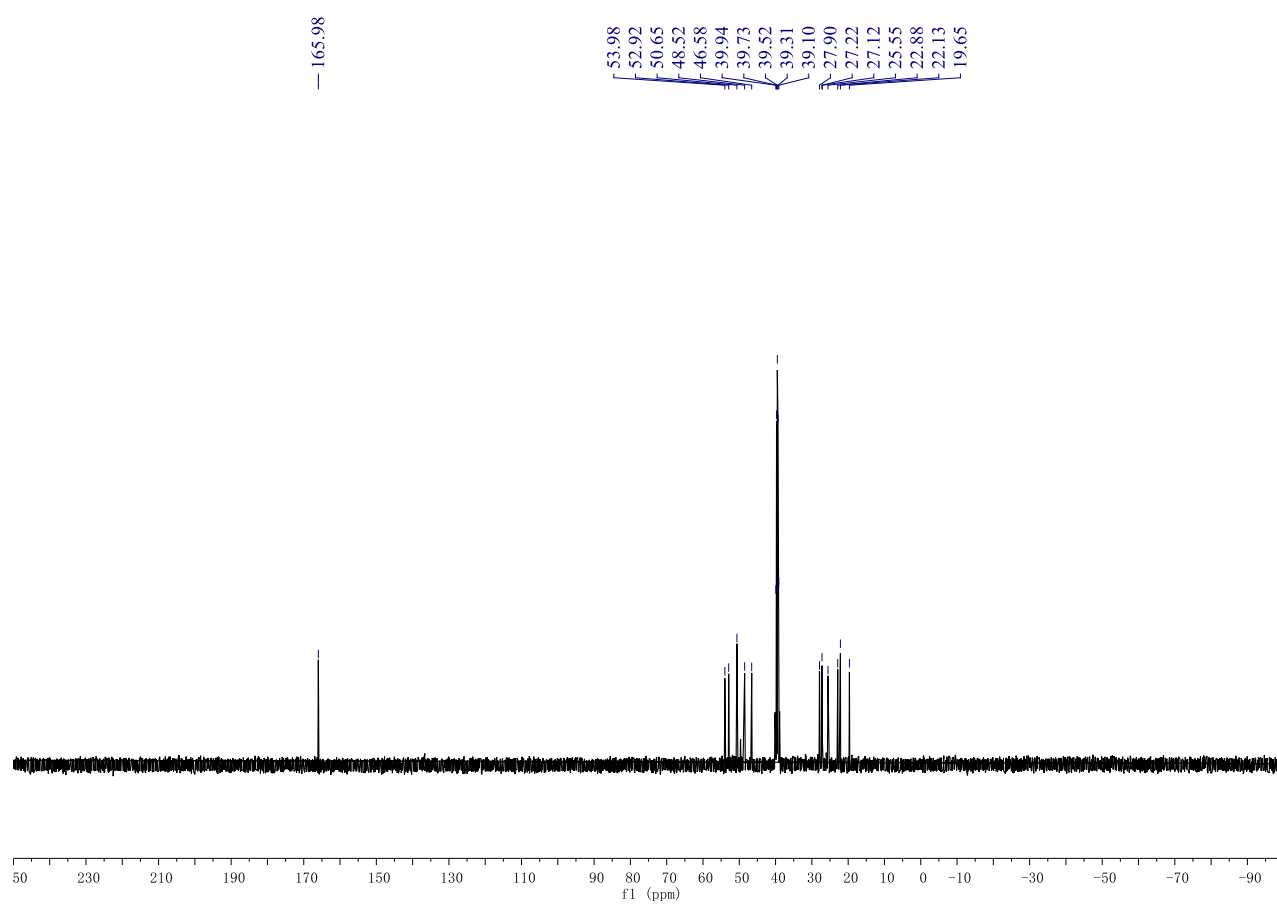

### FT-IR spectrum of [HSO<sub>3</sub>-BDBU]H<sub>2</sub>PO<sub>4</sub>:

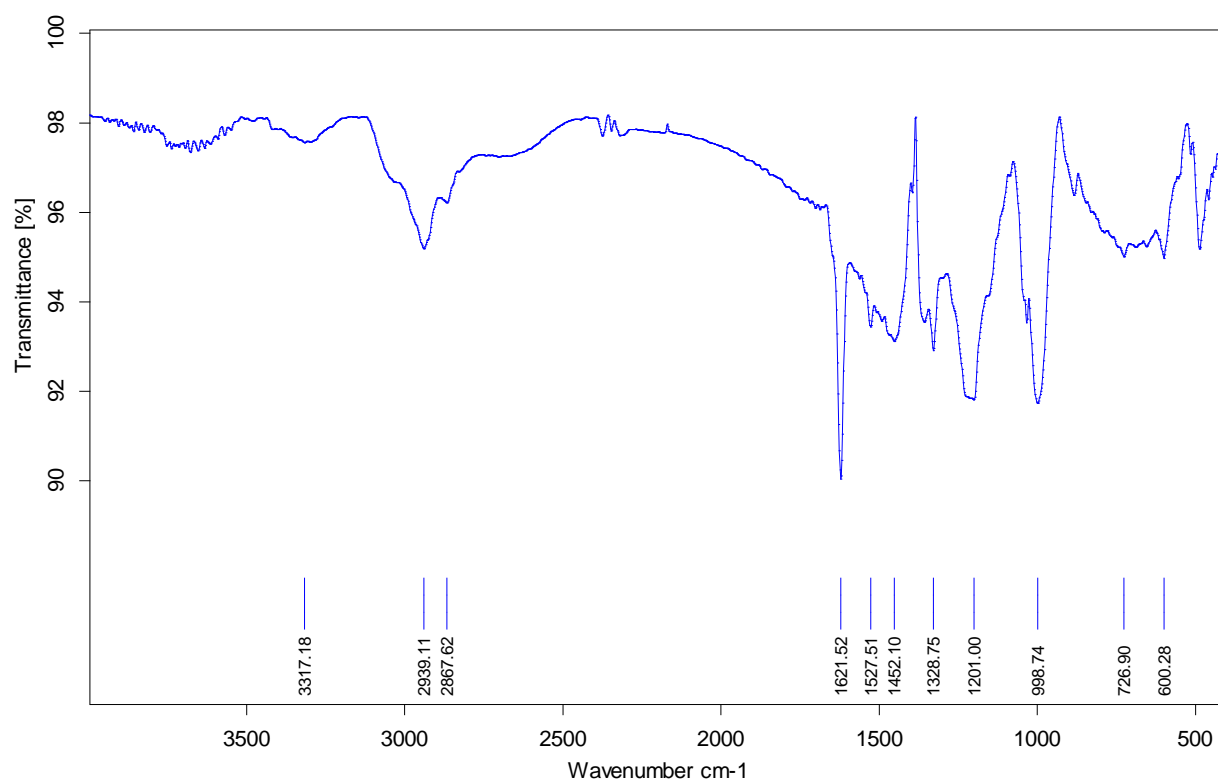

### ESI-MS spectrum of [HSO<sub>3</sub>-BDBU]H<sub>2</sub>PO<sub>4</sub>:

y: ii-9 #11 RT: 0.14 AV: 1 NL: 1.70E5  
T: + p ESI ms [50.00-500.00]

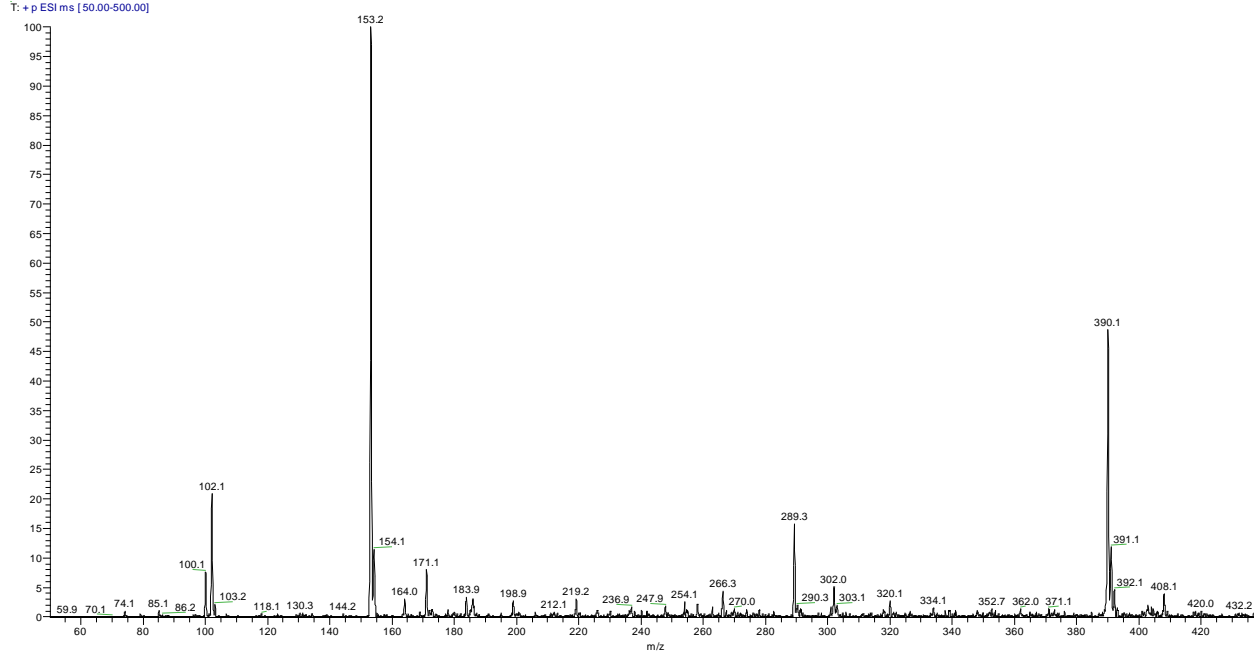

**[HSO<sub>3</sub>-BPy]H<sub>2</sub>PO<sub>4</sub>:**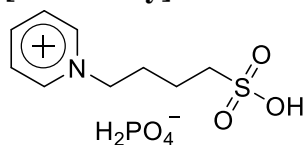

Colorless viscous liquid; <sup>1</sup>H NMR (400 MHz, D<sub>2</sub>O)  $\delta$ : 1.77-1.85 (m, 2H), 2.15-2.22 (m, 2H), 2.95-2.99 (t, *J* = 7.6 Hz, 2H), 4.65-4.69 (t, *J* = 7.6 Hz, 2H), 8.06-8.10 (t, *J* = 6.9 Hz, 2H), 8.53-8.57 (t, *J* = 7.8 Hz, 1H), 8.86-8.88 (d, *J* = 6.0 Hz, 2H) ppm; <sup>13</sup>C NMR (100 MHz, D<sub>2</sub>O)  $\delta$ : 20.84, 29.28, 49.91, 61.18, 128.28, 144.23, 145.65 ppm; FT-IR (KBr) *V*<sub>max</sub>/ cm<sup>-1</sup>: 3418.43, 2950.08, 2843.38, 2308.70, 1637.56, 1490.61, 1176.73, 1004.85, 886.76, 768.27, 681.73, 486.51; ESI-MS: *m/z* (+) 100.1, 102.1, 317.0.

**<sup>1</sup>H NMR spectrum of [HSO<sub>3</sub>-BPy]H<sub>2</sub>PO<sub>4</sub>:**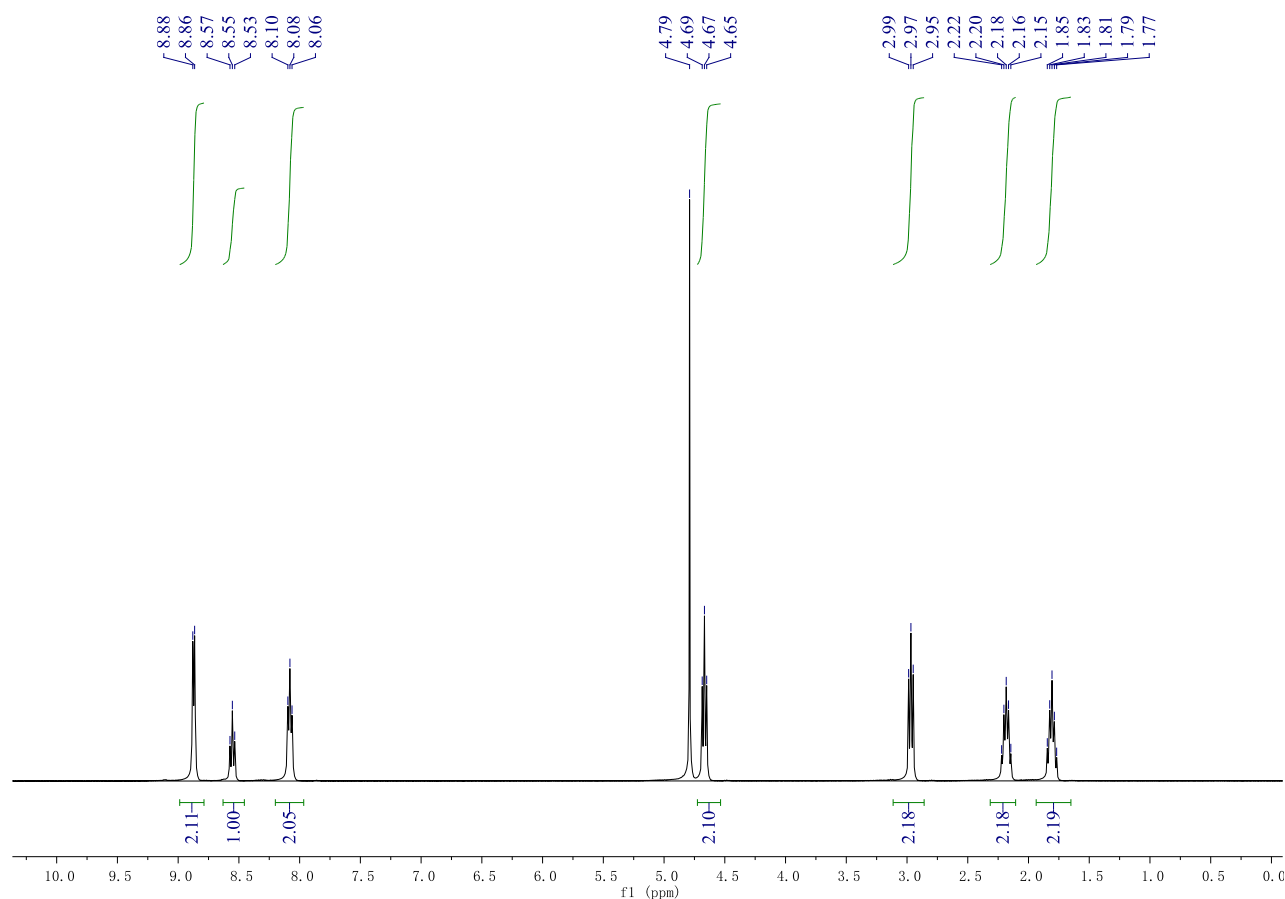

**$^{13}\text{C}$  NMR spectrum of  $[\text{HSO}_3\text{-BPy}]\text{H}_2\text{PO}_4$ :**

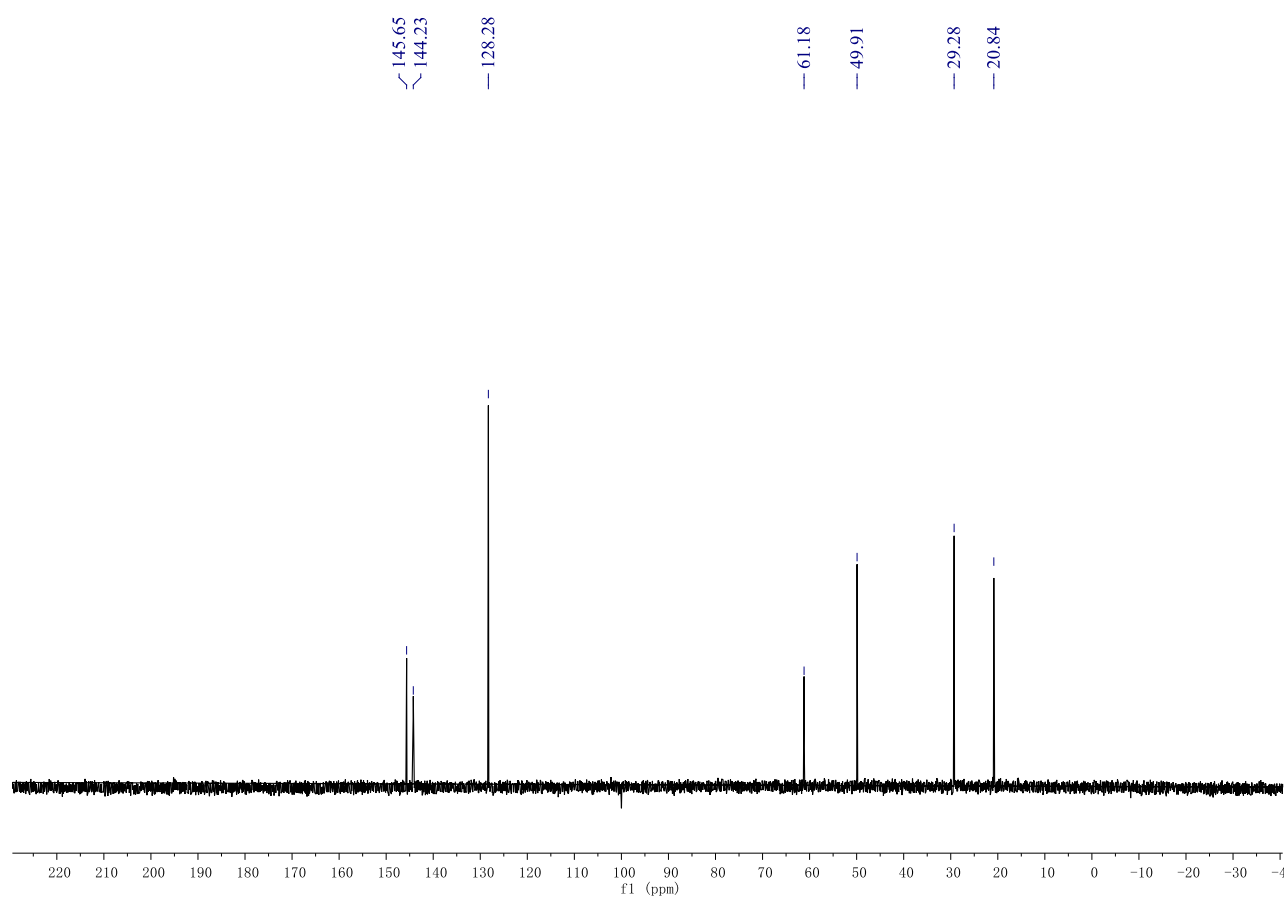

### FT-IR spectrum of [HSO<sub>3</sub>-BPy]H<sub>2</sub>PO<sub>4</sub>:

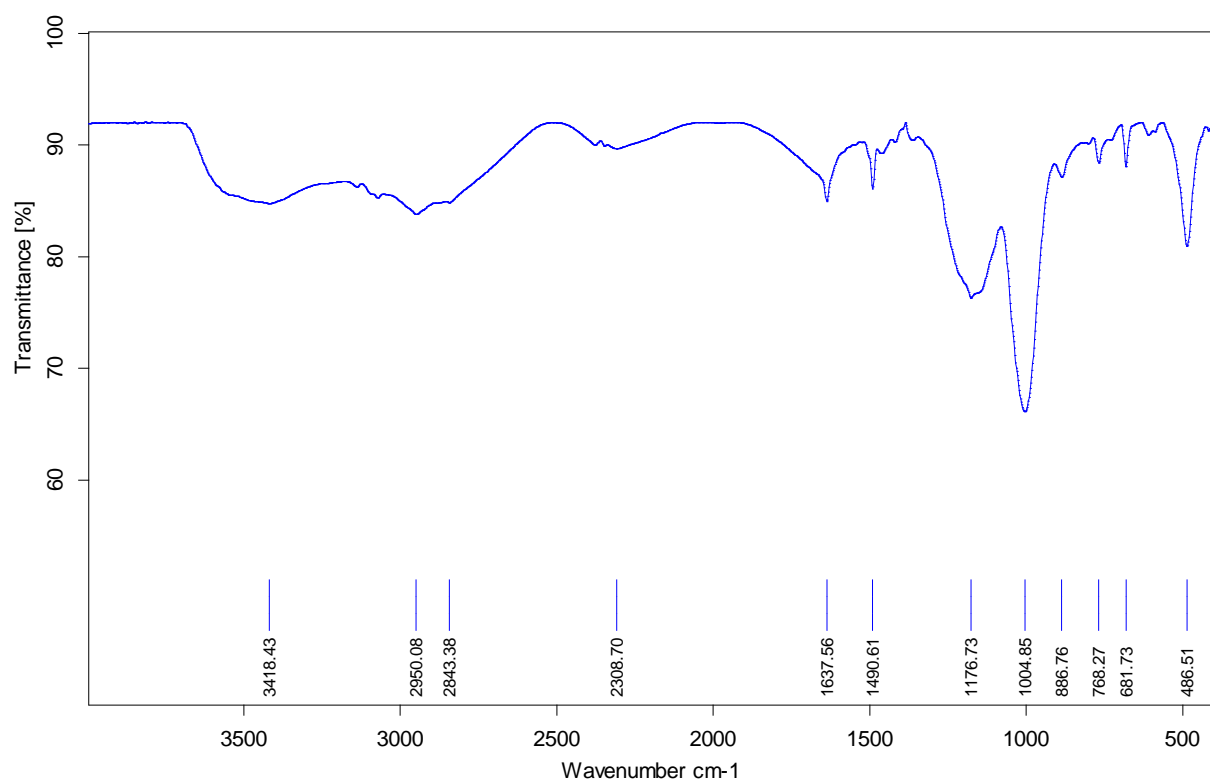

### ESI-MS spectrum of [HSO<sub>3</sub>-BPy]H<sub>2</sub>PO<sub>4</sub>:

y-II-6 #18 RT: 0.24 AV: 1 NL: 2.47E5  
T: + p ESI ms [50.00-500.00]

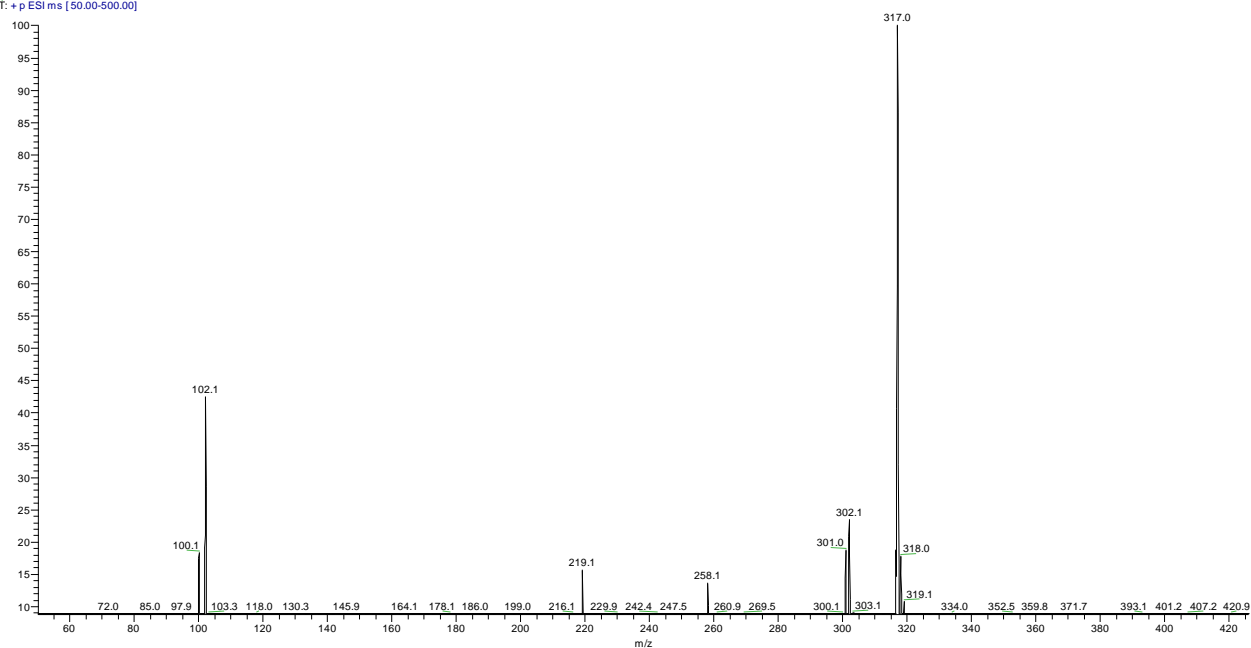



**[HSO<sub>3</sub>-BMim]H<sub>2</sub>PO<sub>4</sub>:**

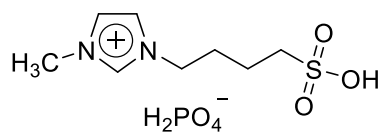

Colorless viscous liquid; <sup>1</sup>H NMR (400 MHz, D<sub>2</sub>O) δ: 1.66-1.74 (m, 2H), 1.95-2.02 (m, 2H), 2.89-2.92 (t, *J* = 7.6 Hz, 2H), 3.85 (s, 3H), 4.19-4.23 (t, *J* = 7.2 Hz, 2H), 7.40-7.46 (2H), 8.71 (s, 1H) ppm; <sup>13</sup>C NMR (100 MHz, D<sub>2</sub>O) δ: 20.59, 27.76, 35.37, 48.60, 49.74, 121.85, 123.35, 135.57 ppm; FT-IR (KBr) V<sub>max</sub>/ cm<sup>-1</sup>: 3161.71, 2938.26, 2308.85, 1573.27, 1460.51, 1167.84, 1001.78, 886.43, 745.78, 484.87; ESI-MS: *m/z* (+) 100.1, 102.1, 219.3, 320.1.

**<sup>1</sup>H NMR spectrum of [HSO<sub>3</sub>-BMim]H<sub>2</sub>PO<sub>4</sub>:**

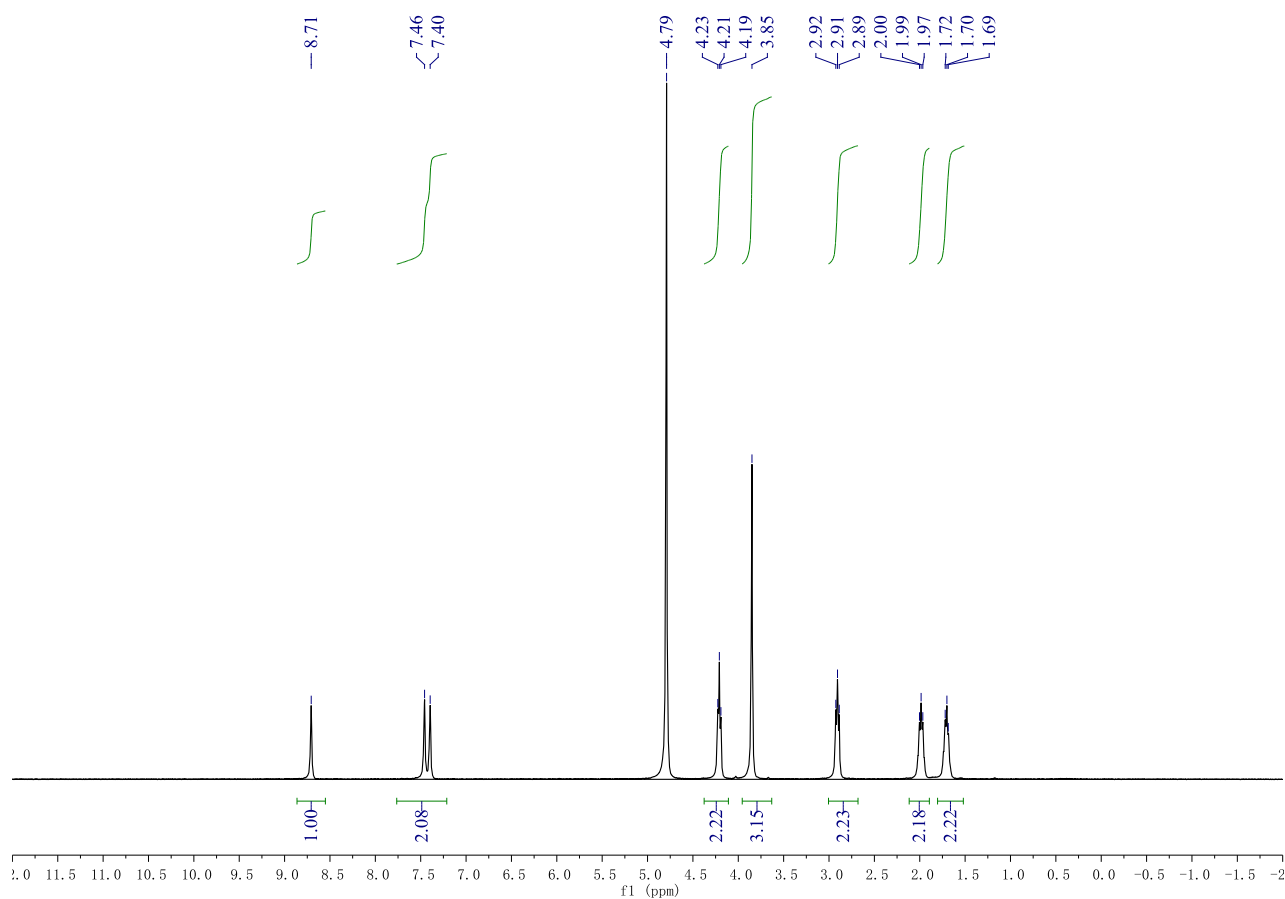

**$^{13}\text{C}$  NMR spectrum of  $[\text{HSO}_3\text{-BMim}]\text{H}_2\text{PO}_4$ :**

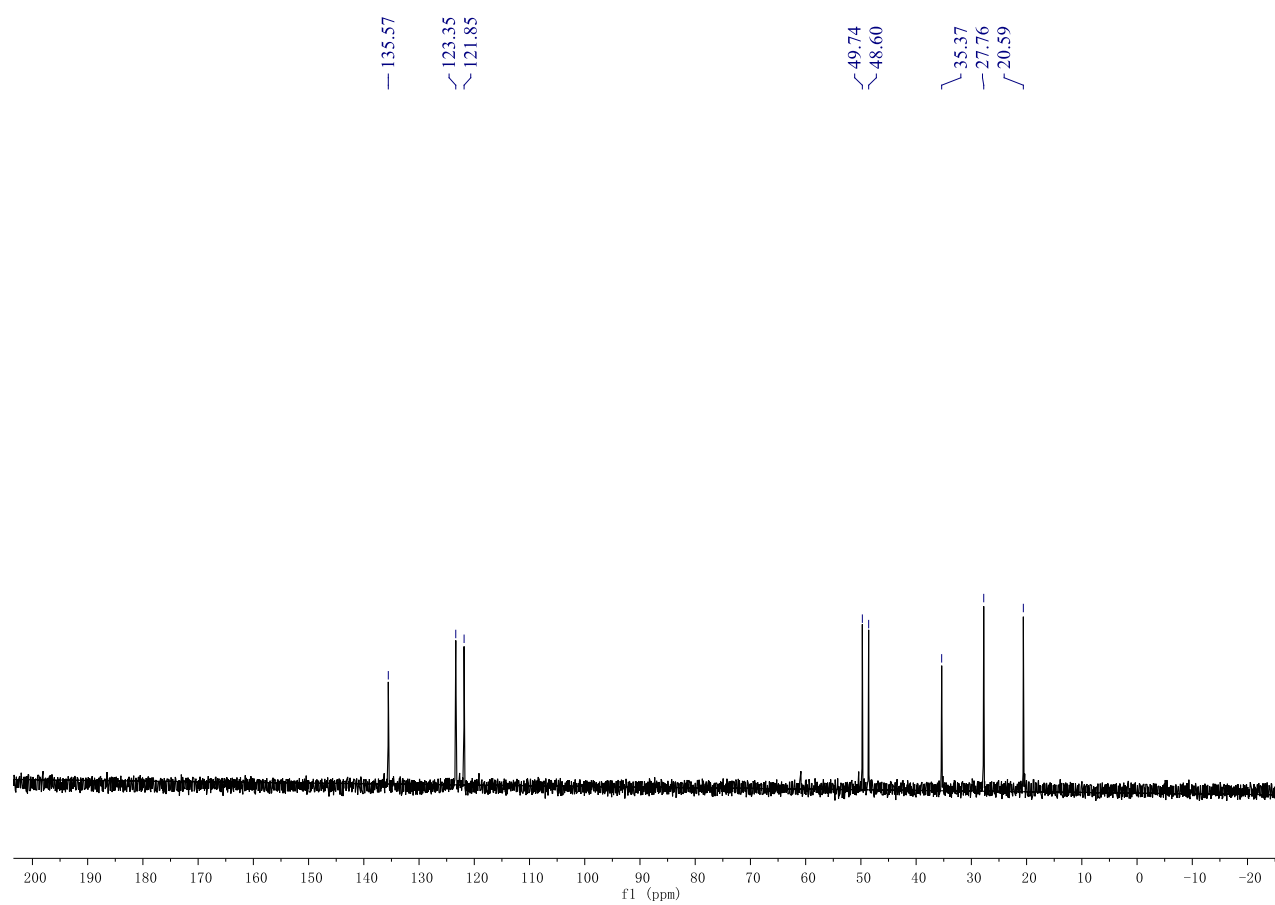

### FT-IR spectrum of [HSO<sub>3</sub>-BMim]H<sub>2</sub>PO<sub>4</sub>:

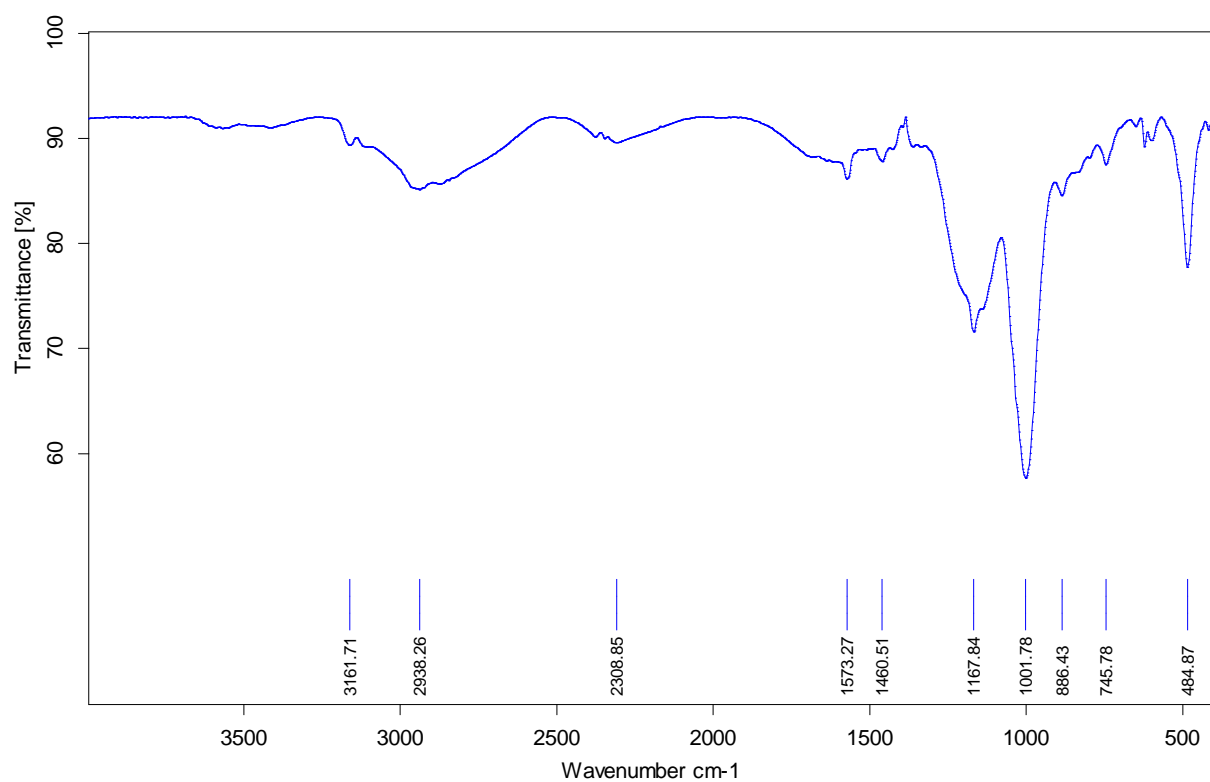

### ESI-MS spectrum of [HSO<sub>3</sub>-BMim]H<sub>2</sub>PO<sub>4</sub>:

y-II-7 #1 RT: 0.00 AV: 1 NL: 2.84E5  
T: +p ESI ms [50.00-500.00]

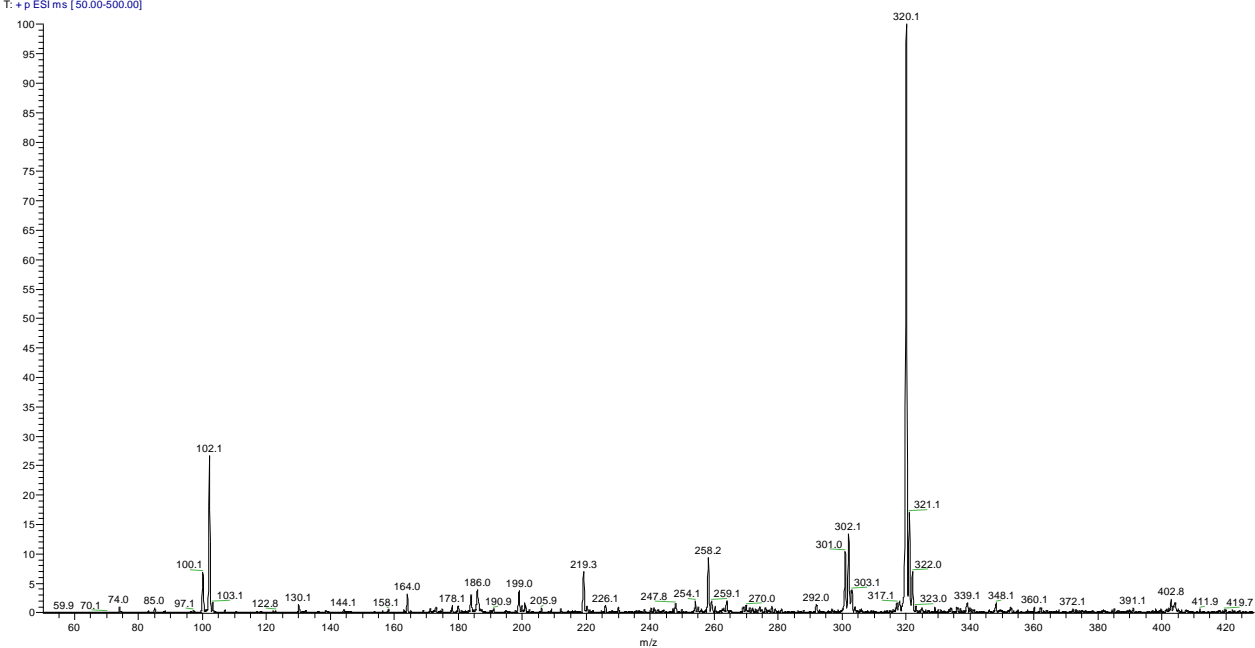

**[HSO<sub>3</sub>-BNEt<sub>3</sub>]H<sub>2</sub>PO<sub>4</sub>:**

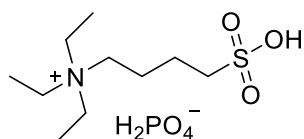

Colorless viscous liquid; <sup>1</sup>H NMR (400 MHz, D<sub>2</sub>O)  $\delta$ : 1.22-1.26 (t,  $J$  = 6.8, 9H), 1.77-1.83 (m, 4H), 2.92-2.96 (t,  $J$  = 6.8 Hz, 2H), 3.17-3.29 (m, 8H) ppm; <sup>13</sup>C NMR (100 MHz, D<sub>2</sub>O)  $\delta$ : 6.55, 19.86, 21.16, 49.96, 52.53, 55.90 ppm; FT-IR (KBr)  $\nu_{\text{max}}$ / cm<sup>-1</sup>: 3679.26, 2950.42, 1487.43, 1361.83, 1213.30, 1004.20, 884.39, 799.40, 730.67, 608.27 488.00; ESI-MS:  $m/z$  (+) 100.1, 102.1, 238.3, 339.1.

**<sup>1</sup>H NMR spectrum of [HSO<sub>3</sub>-BNEt<sub>3</sub>]H<sub>2</sub>PO<sub>4</sub>:**

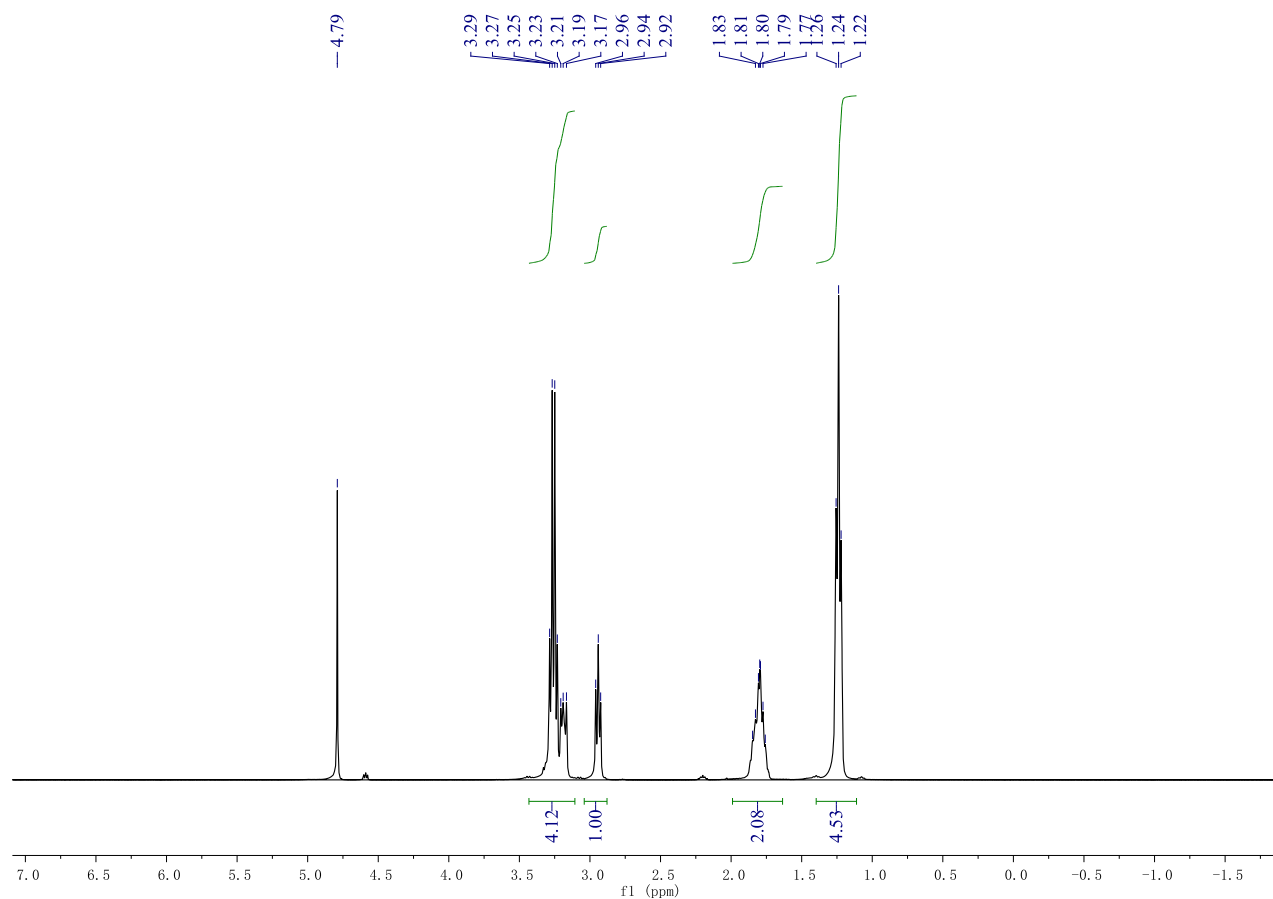

**$^{13}\text{C}$  NMR spectrum of  $[\text{HSO}_3\text{-BNEt}_3]\text{H}_2\text{PO}_4$ :**

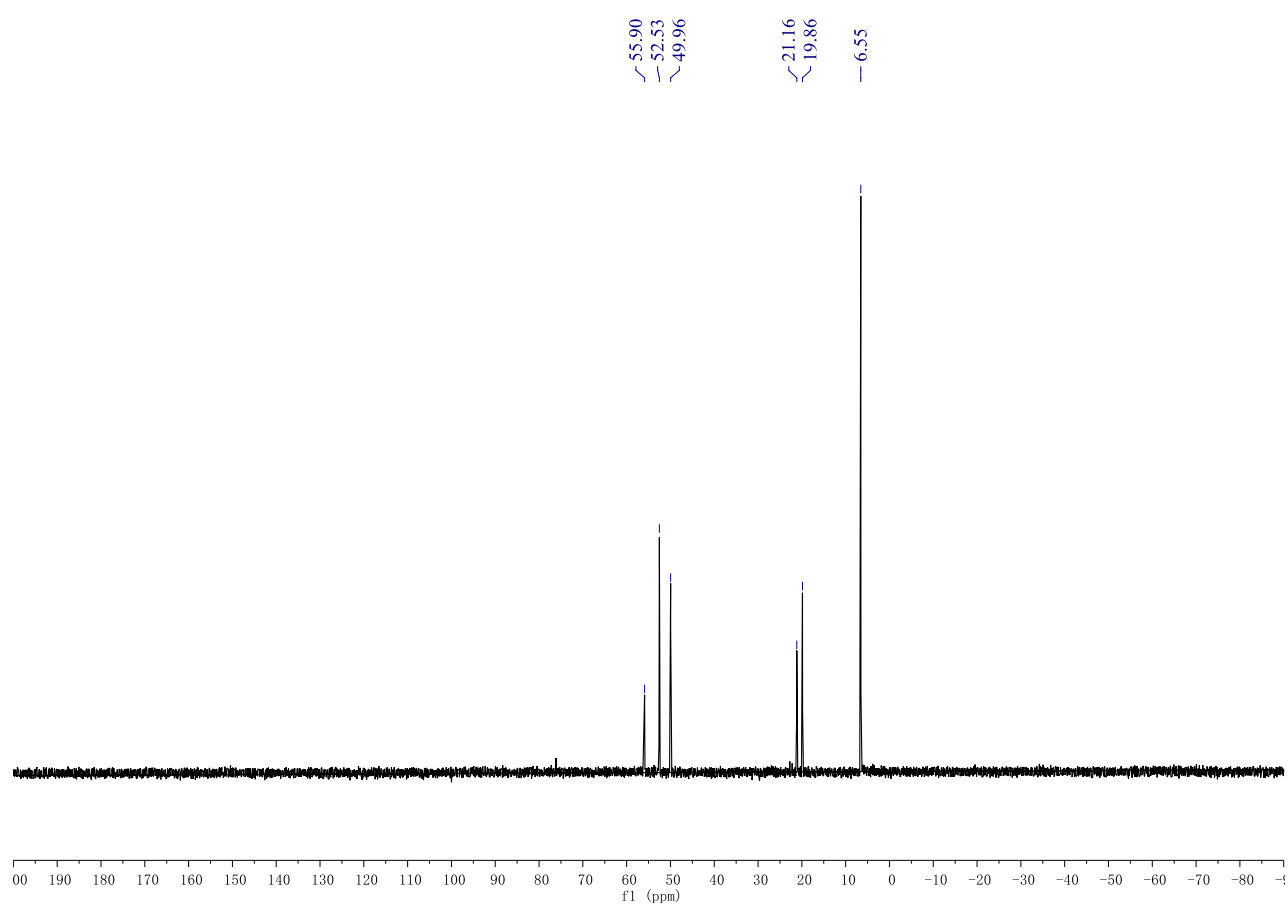

### FT-IR spectrum of [HSO<sub>3</sub>-BNEt<sub>3</sub>]H<sub>2</sub>PO<sub>4</sub>:

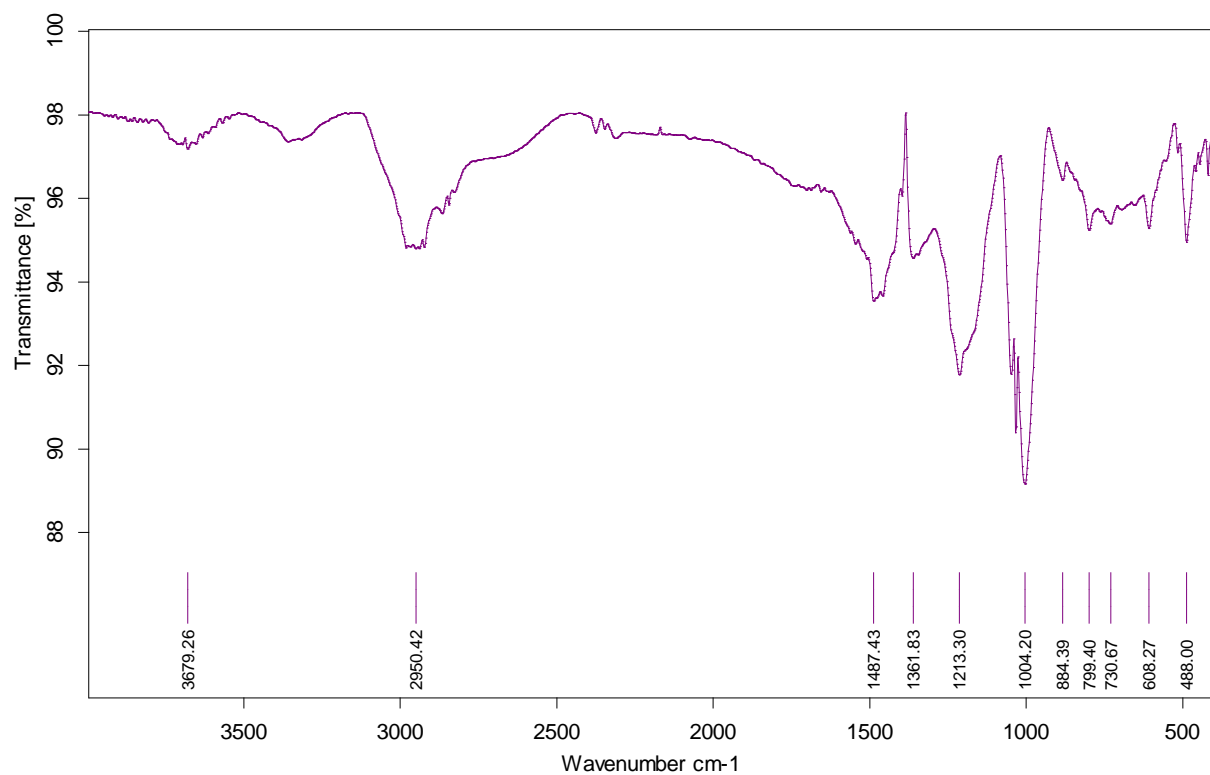

### ESI-MS spectrum of [HSO<sub>3</sub>-BNEt<sub>3</sub>]H<sub>2</sub>PO<sub>4</sub>:

44-8 #63 RT: 0.73 AV: 1 NL: 1.30E5  
T: + p ESI Full ms [ 50.00-400.00]

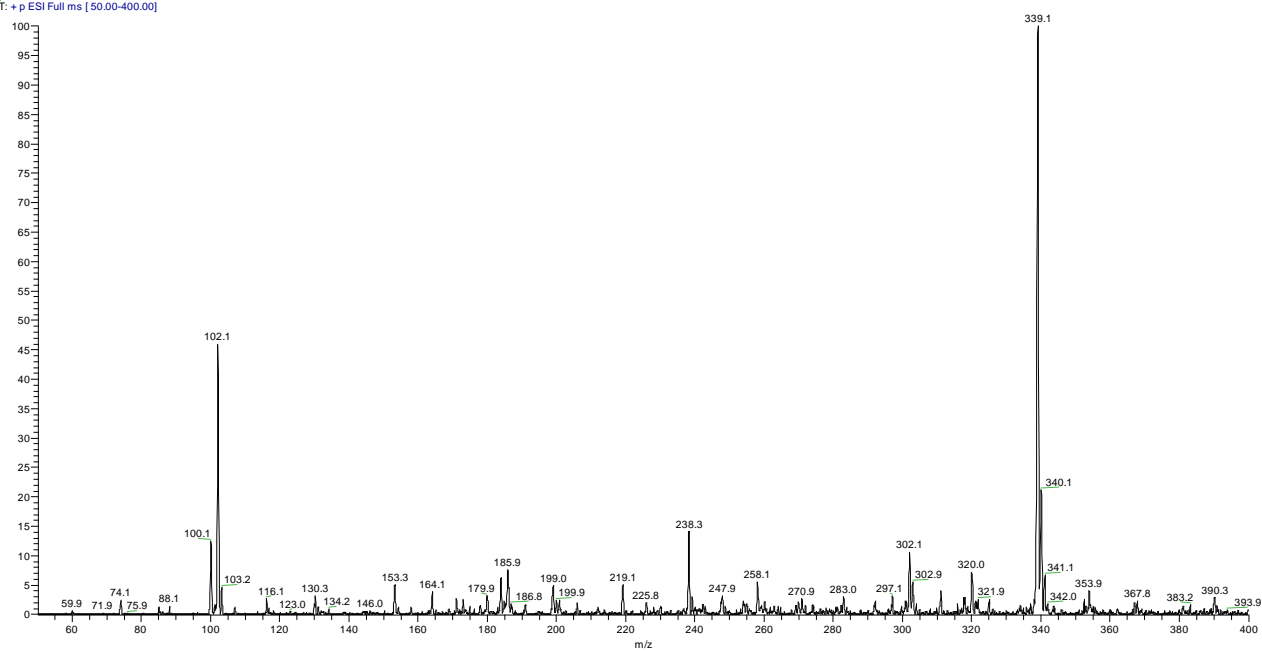



# <sup>13</sup>C NMR spectrum of polyricinoleic acid:

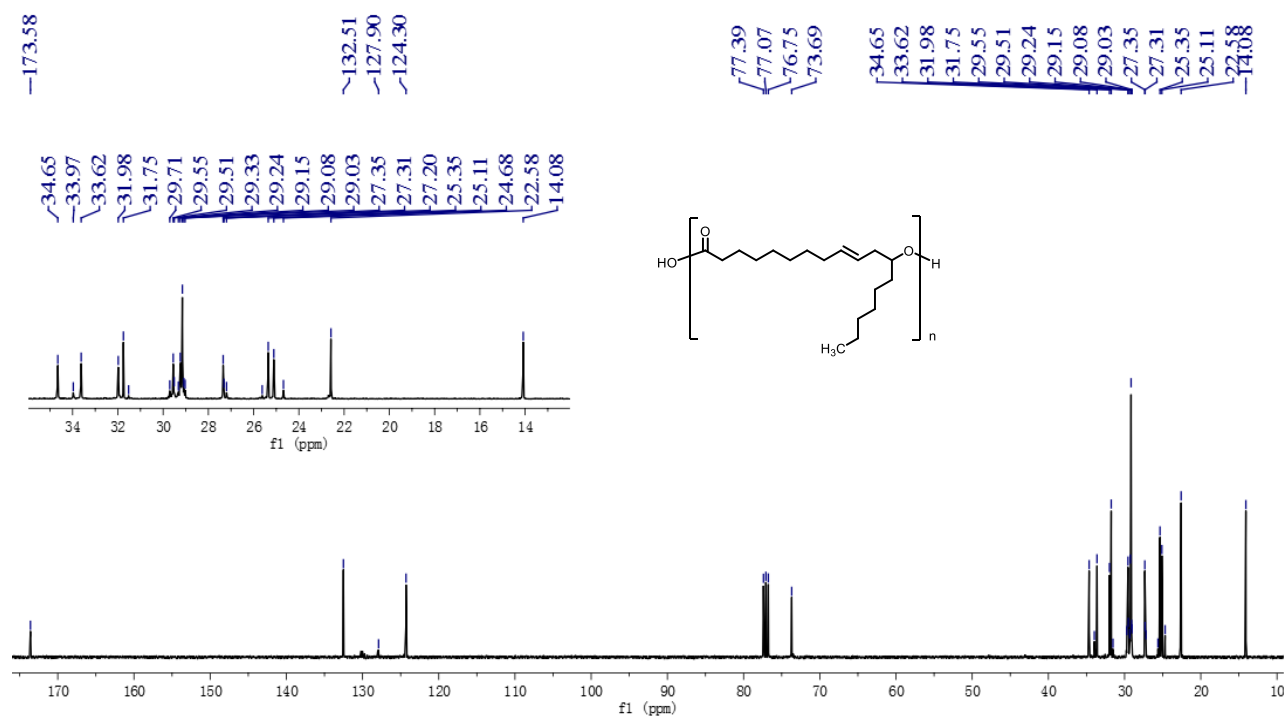



### FT-IR spectrum of polyricinoleic acid:

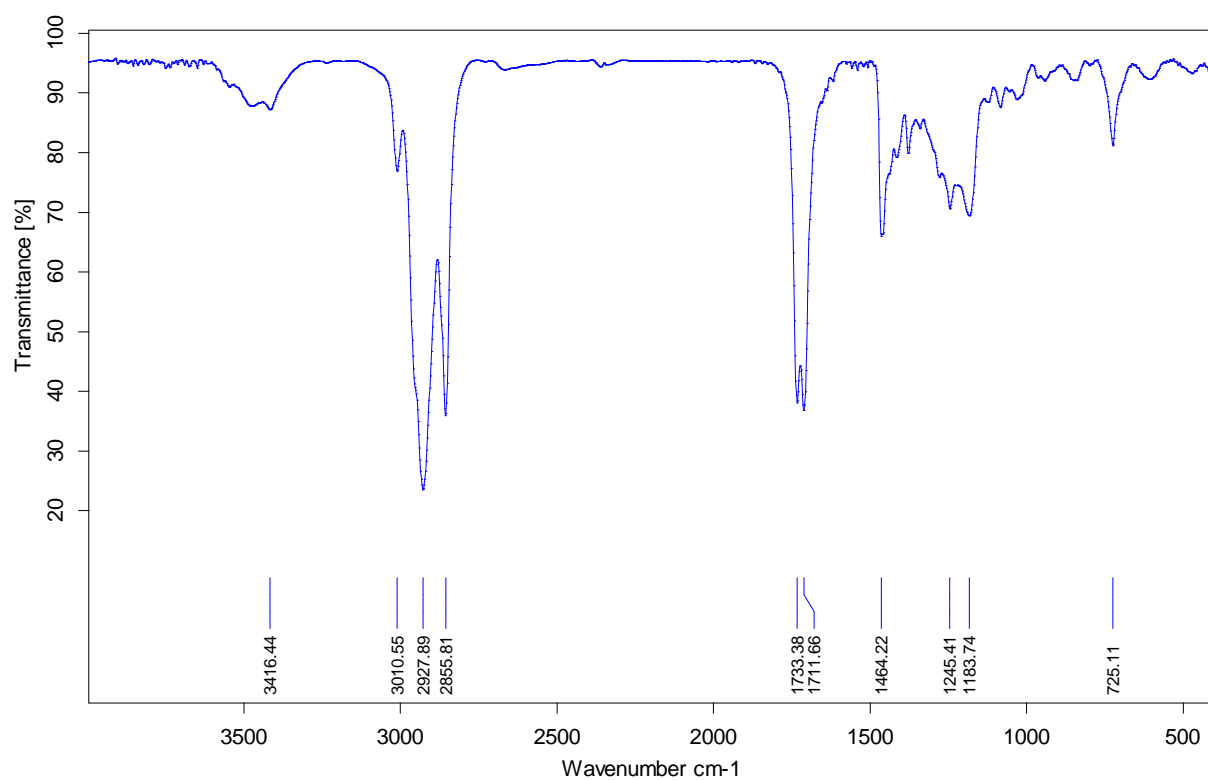

## ESI-MS spectrum of polyricinoleic acid:

004 #3 RT: 0.06 AV: 1 NL: 7.66E2  
T: + c ESI ms [ 200.00-2000.00]

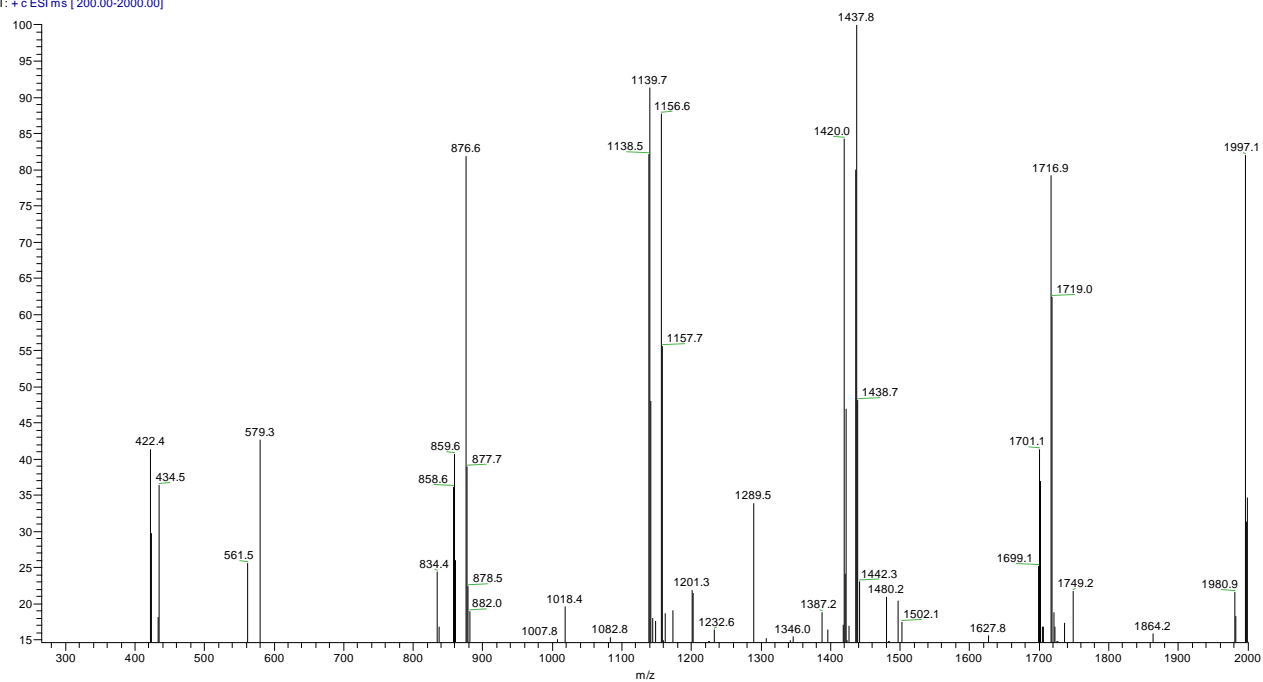

## References

- [1] Guo, H.; Li, X.; Wang, J. L.; Jin, X. H.; Lin, X. F. Acidic ionic liquid [NMP]H<sub>2</sub>PO<sub>4</sub> as dual solvent-catalyst for synthesis of  $\beta$ -alkoxyketones by the oxa-Michael addition reactions. *Tetrahedron* **2010**, 66, 8300-8303.
- [2] Tao, F. R.; Zhuang, C.; Cui, Y. Z.; Xu, J. Dehydration of glucose into 5-hydroxymethylfurfural in SO<sub>3</sub>H-functionalized ionic liquids. *Chinese Chemical Letters* **2014**, 25, 757-761.
